# The SiaABC threonine phosphorylation pathway controls biofilm formation in response to carbon availability in *Pseudomonas aeruginosa*

Wee-Han Poh<sup>2‡</sup>, Jianqing Lin<sup>7,9‡</sup>, Brendan Colley<sup>3a</sup>, Nicolai Müller<sup>4</sup>, Boon Chong Goh<sup>7,8</sup>, David Schleheck<sup>4</sup>, Abbas El Sahili<sup>5,7</sup>, Andreas Marquardt<sup>4</sup>, Yang Liang<sup>2,5b</sup>, Staffan Kjelleberg<sup>2,3,5</sup>, Julien Lescar<sup>5,7\*</sup>, Scott A. Rice<sup>2,5,6\*</sup> and Janosch Klebensberger<sup>1\*</sup>

‡ These authors contributed equally to the work

\* Correspondence: [janosch.klebensberger@itb.uni-stuttgart.de](mailto:janosch.klebensberger@itb.uni-stuttgart.de), [rscott@ntu.edu.sg](mailto:rscott@ntu.edu.sg),  
[julien@ntu.edu.sg](mailto:julien@ntu.edu.sg)

<sup>1</sup>University of Stuttgart, Institute of Biochemistry and Technical Biochemistry, Stuttgart, Germany

<sup>2</sup>Singapore Centre for Environmental Life Sciences Engineering, Nanyang Technological University, Singapore

<sup>3</sup>Centre for Marine Science and Innovation, School of Biological, Earth and Environmental Sciences, University of New South Wales, Sydney, New South Wales, Australia (<sup>a</sup>present address: Bio Molecular Systems, Sydney, Australia)

<sup>4</sup>Konstanz Research School Chemical Biology, Departments of Chemistry and Biology, University of Konstanz, D-78464 Konstanz, Germany

<sup>5</sup>The School of Biological Sciences, Nanyang Technological University, Singapore (<sup>b</sup>present address: School of Medicine, Southern University of Science and Technology (SUSTec), Shenzhen, Guangdong, China)

<sup>6</sup>the itthree Institute, The University of Technology Sydney, Sydney Australia

<sup>7</sup>NTU Institute of Structural Biology, Nanyang Technological University, Singapore

<sup>8</sup>Antimicrobial Resistance Interdisciplinary Research Group, Singapore-MIT Alliance for Research and Technology, Singapore

<sup>9</sup>Singapore Immunology Network (SIgN), Agency for Science, Technology and Research, Singapore

**Running title:** The SiaABC partner switch system controls biofilm formation

**Keywords:** Cell aggregation, Biofilms, PP2C, c-di-GMP, *Pseudomonas aeruginosa*, threonine phosphorylation pathway, partner-switching mechanism, signal interference

## 32 **Abstract**

33 The critical role of bacterial biofilms in chronic human infections calls for novel anti-biofilm  
34 strategies targeting the regulation of biofilm development. However, the regulation of biofilm  
35 development is very complex and can include multiple, highly interconnected signal  
36 transduction/response pathways, which are incompletely understood. We demonstrated  
37 previously that in the opportunistic, human pathogen *P. aeruginosa*, the PP2C-like protein  
38 phosphatase SiaA and the di-guanylate cyclase SiaD control the formation of macroscopic  
39 cellular aggregates, a type of suspended biofilms, in response to surfactant stress. In this study,  
40 we demonstrate that the SiaABC proteins represent a signal response pathway that functions  
41 through a partner switch mechanism to control biofilm formation. We also demonstrate that  
42 SiaABCD functionality is dependent on carbon substrate availability for a variety of substrates,  
43 and that upon carbon starvation, SiaB mutants show impaired dispersal, in particular with the  
44 primary fermentation product ethanol. This suggests that carbon availability is at least one of the  
45 key environmental cues integrated by the SiaABCD system. Further, our biochemical,  
46 physiological and crystallographic data reveals that the phosphatase SiaA and its kinase  
47 counterpart SiaB balance the phosphorylation status of their target protein SiaC at threonine 68  
48 (T68). Crystallographic analysis of the SiaA-PP2C domain shows that SiaA is present as a dimer.  
49 Dynamic modelling of SiaA with SiaC suggested that SiaA interacts strongly with phosphorylated  
50 SiaC and dissociates rapidly upon dephosphorylation of SiaC. Further, we show that the known  
51 phosphatase inhibitor fumonisin inhibits SiaA mediated phosphatase activity *in vitro*. In  
52 conclusion, the present work improves our understanding of how *P. aeruginosa* integrates  
53 specific environmental conditions, such as carbon availability and surfactant stress, to regulate  
54 cellular aggregation and biofilm formation. With the biochemical and structural characterization of  
55 SiaA, initial data on the catalytic inhibition of SiaA, and the interaction between SiaA and SiaC,  
56 our study identifies promising targets for the development of biofilm-interference drugs to combat  
57 infections of this aggressive opportunistic pathogen.

## 58 **Author Summary**

59 *Pseudomonas aeruginosa* is a Gram-negative bacterium that is feared within clinical  
60 environments due to its potential to cause life-threatening acute and chronic infections. One  
61 cornerstone of its success is the ability to form and disperse from biofilms, which are self-made,  
62 multicellular structures that protect the individual cell from the human immune system and  
63 antibiotic treatment. As such, therapies that combine a biofilm-interference strategy and the use  
64 of antimicrobial drugs represent one of the promising strategies to tackle infections of this  
65 organism. With the current study, we gain a deeper understanding of the SiaABCD mediated  
66 biofilm formation in response to clinically relevant environmental conditions. Further, our structural  
67 and biochemical characterization of the PP2C-type protein-phosphatase SiaA and the partner  
68 switch protein SiaC suggest that both represent promising novel targets for the development of  
69 future anti-biofilms drugs based on a signal interference strategy.

## 70 **Introduction**

71 Biofilms are multicellular structures embedded in a self-made matrix, which can occur attached  
72 at a solid surface, at the gas-liquid interface as a pellicle, or freely floating as suspended  
73 aggregates (flocs) in the liquid phase [1–3]. The ability to form and disperse from biofilms is a  
74 ubiquitous feature of microorganisms, which includes the genetically controlled production of  
75 extracellular polymeric substances (EPS) such as polysaccharides, eDNA and proteinaceous  
76 surface adhesins [4–6]. Biofilm formation can be triggered in response to oxidative and nitrosative  
77 stress [7,8] and toxic compounds such as antibiotics [9,10], surfactants [11,12] or primary  
78 fermentation products [13,14]. Cells embedded in biofilms show increased resistance towards the  
79 presence of such stressors compared to their single-cell, planktonic counterparts, which explains  
80 the evolutionary success of the biofilm lifestyle [15–19]. As a consequence, biofilms are  
81 problematic in health-care settings despite stringent hygiene regimes [20–22]. Biofilms are also  
82 associated with the establishment of chronic infections that are recalcitrant to the effects of the  
83 host immune system and therapeutic interventions [23–27] and hence are almost impossible to  
84 eradicate with conventional therapies [28–31].

85 The regulation of biofilm development and virulence traits is complex and can include multiple,  
86 highly interconnected signal transduction pathways [6,32–36]. In addition to quorum sensing (QS)  
87 [37,38], nucleotide-based second messengers and changes in protein phosphorylation represent  
88 key mechanisms for the regulation of these physiological changes [39–42]. Protein  
89 phosphorylation is most often mediated by two-component systems (TCSs) or chemosensory  
90 signalling pathways [43–45]. TCSs are typically composed of a sensor kinase and a cognate  
91 response regulator that elicits a specific response upon its phosphorylation. Most sensor kinases  
92 in bacteria belong to the family of histidine kinases, transferring a phosphoryl group from a  
93 conserved histidine of its transmitter domain to a specific aspartate residue in the receiver domain  
94 of the corresponding response regulator. This aspartate phosphorylation is labile and, thus,  
95 specific phosphatases are usually not required to inactivate the response regulator over time. In

96 contrast, the phosphorylation of a serine or threonine residue by serine/threonine kinases (STK),  
97 are more stable and thus require the additional presence of a protein phosphatase, e.g. protein-  
98 phosphatase family-2C (PP2C)-like phosphatases, to facilitate a reversible regulation [46,47].

99 *Pseudomonas aeruginosa*, an opportunistic human pathogen of critical concern, is an ubiquitous  
100 organism that can thrive in multiple environmental niches and genetic evidence indicates that  
101 infections usually arise from environmental sources [48–51]. Various regulatory pathways affect  
102 its biofilm formation and virulence traits, including, but not limited to, the GacS/GacA system, the  
103 threonine phosphorylation pathway (TPP) and the Wsp, Yfie or HptB pathways [24,52–57]. While  
104 *P. aeruginosa* does not generally infect healthy humans, it is a serious threat in hospital  
105 environments, particularly for individuals with burn wounds or chronic diseases such as  
106 obstructive pulmonary disease (COPD) and the genetic disorder cystic fibrosis (CF)[28,58–62].  
107 In addition to surface attached biofilms, *P. aeruginosa* also forms suspended biofilms (i.e. cellular  
108 aggregates)[63,64], which are medically relevant as they are regularly observed in chronic  
109 infections [26,27,65–67]. Moreover, suspended biofilms have been shown to greatly influence the  
110 development, structure and function of their surface-attached counterparts and have thus been  
111 suggested to play an important role in niche colonisation and chronic infections [68,69].

112 We previously demonstrated that PP2C-like protein phosphatase SiaA and the di-guanylate  
113 cyclase (DGC) SiaD regulate the formation of large, macroscopic, DNA-containing suspended  
114 biofilms in response to the surfactant sodium dodecyl sulfate (SDS) in a c-di-GMP-dependent  
115 manner [11,70–72]. We now report that all genes encoded in the *siaABCD* operon are involved  
116 in regulation of the cellular aggregation in response to carbon availability with a variety of growth  
117 substrates. Our study demonstrates that the phosphorylation status of the SiaC protein at  
118 threonine 68 (T68) is crucial for this regulation, and that phosphorylated SiaC represents a  
119 substrate for the phosphatase SiaA and its kinase counterpart SiaB, which is in line with results  
120 of a recently reported study [73]. In addition, the crystal structures of the PP2C-domain of SiaA  
121 and of the SiaC protein provided insights into their catalytic and regulatory mechanisms.

## 122 Results

### 123 ***SiaABCD* is involved in biofilm formation during growth on SDS and glucose**

124 Cells of *P. aeruginosa* preferentially grow as macroscopic suspended biofilms (cellular  
125 aggregates in the mm range) in minimal medium with SDS [11]. To investigate whether all genes  
126 of the *siaABCD* operon [70] are involved in biofilm formation under these conditions, we tested  
127 individual mutant strains in microtiter plates for macroscopic aggregation and compared it to  
128 cultures growing on glucose (**Fig 1**).

129 As shown previously [70], growth on SDS led to the formation of macroscopic aggregates in the  
130 parental strain but not in the  $\Delta siaA$  and  $\Delta siaD$  mutants. Likewise, no macroscopic aggregates  
131 were observed in cultures of  $\Delta siaC$ , whereas  $\Delta siaB$  showed increased aggregation. The  
132 aggregative behaviour of cells was inversely correlated with the optical density (OD<sub>600</sub>) of the  
133 surrounding medium with higher OD<sub>600</sub> values for strains  $\Delta siaA$ ,  $\Delta siaC$  and  $\Delta siaD$  (darker colour  
134 in normalized pictures) compared the parental strain or the  $\Delta siaB$  mutant. In contrast, no  
135 macroscopic aggregates were found during growth with glucose for all strains. However, the  
136 OD<sub>600</sub> of the culture medium of glucose-grown cultures followed a similar pattern as those grown  
137 on SDS. Growth on glucose has previously been found to occur mainly as attached or suspended  
138 biofilms (aggregates of up to 400 nm in size), which quickly disperse upon carbon starvation in a  
139 c-di-GMP-dependent manner [63]. To study, whether differences in the ability to form suspended  
140 biofilms could explain the observed OD<sub>600</sub> pattern of the *sia*-mutants, we analysed glucose-  
141 growing cultures with scanning electron microscopy (SEM) and laser diffraction analysis (LDA).

### 143 ***SiaABCD* regulates the ratio of freely suspended and aggregated cells**

144 SEM imaging (**Fig 2**, 10,000 $\times$ ; left panels) showed the presence of three-dimensional structures  
145 composed of densely packed microbial cells that projected above the substratum. The  
146 multicellular aggregates appeared to be less structured in the  $\Delta siaA$ ,  $\Delta siaC$  and  $\Delta siaD$  mutants  
147 compared to the parental strain. In contrast, the  $\Delta siaB$  mutant formed much larger and more

148 densely packed aggregates than the parental strain. Similar differences in aggregate sizes were  
149 also noted at lower magnification (1,300 $\times$ ), with the additional observation that aggregates were  
150 generally less abundant for the  $\Delta siaA$ ,  $\Delta siaC$  and  $\Delta siaD$  mutants.

151 Light diffraction analysis (LDA) can be used to determine the size distribution of PAO1 aggregates  
152 in liquid cultures<sup>64</sup>. LDA analysis in the current study confirmed these results for cultures of the  
153 wildtype strain, which were dominated by particles  $> 10 \mu\text{m}$  ( $\geq 95\% \pm 2\%$  of the total bio-volume  
154 of all particles). Particles  $< 10 \mu\text{m}$ , which include the single cells, represented only a minor fraction  
155 ( $\leq 5\% \pm 2\%$ ). In line with SEM results, the distribution of particles in cultures of the  $\Delta siaA$ ,  $\Delta siaC$   
156 and  $\Delta siaD$  mutants were strongly shifted towards smaller sizes. A substantial increase in the total  
157 bio-volume of all particles  $< 10 \mu\text{m}$  for  $\Delta siaA$  ( $\geq 6.6$  fold),  $\Delta siaC$  ( $\geq 11.8$  fold) and  $\Delta siaD$  ( $\geq 8$  fold)  
158 was consistently observed. In contrast, for cultures of  $\Delta siaB$  the total bio-volume of all particles  $>$   
159  $10 \mu\text{m}$  ( $\geq 99\% \pm 1\%$ ) was considerably higher than for the parental strain. Consequently, almost  
160 no particles  $< 10 \mu\text{m}$  were detected.

### 162 ***SiaABCD regulates biofilm formation as a response to carbon availability***

163 Biofilm formation is a dynamic process that varies according to the time point used for  
164 quantification. The temporal nature of biofilm formation and dispersal can be monitored with a  
165 microtiter plate-based biofilm assay [63]. When the impact of the SiaABCD proteins on the biofilm  
166 life cycle during growth on glucose was studied using this assay, we found the following temporal  
167 pattern of biofilm formation for the wildtype strain: *i*) a steady increase in biofilm formation while  
168 glucose was present in excess; *ii*) a decrease in biofilm formation upon exhaustion of glucose;  
169 and *iii*) an increase in optical density in the culture supernatant that lagged behind biofilm  
170 formation, but continued to increase even after glucose was completely consumed (**Fig 3**). The  
171 latter observation is consistent with the dispersal of cells from the attached and/or suspended  
172 biofilm into the liquid phase in response to carbon starvation [63]. The  $\Delta siaA$ ,  $\Delta siaC$  and  $\Delta siaD$   
173 mutants exhibited a similar growth pattern on glucose as described for the parental strain (**Fig 3**

174 and **Fig S1**). However, all strains showed a decrease in overall biofilm formation and as a result,  
175 the increase in OD<sub>600</sub> upon carbon starvation was also lower. In contrast, the  $\Delta siaB$  mutant  
176 predominantly grew as a biofilm with much lower planktonic growth and with a reduced dispersal  
177 response upon carbon starvation (percentage in biofilm reduction during consecutive sampling  
178 points upon carbon limitation) compared to all other strains.

179 To study whether the regulatory impact of the SiaABCD proteins on biofilm formation can be  
180 expanded to other carbon sources, we additionally tested succinate, ethanol, 2,3-butanediol (**Fig**  
181 **3** and **Fig S1**). For all carbon sources tested, a similar pattern as described for growth on glucose  
182 was observed, with the following two exceptions: *i*) no dispersal of the  $\Delta siaB$  biofilm was observed  
183 when grown on ethanol upon carbon depletion; and *ii*) no dispersal of the  $\Delta siaB$  and wildtype  
184 biofilms was observed during growth on 2,3-butanediol. However, it is important to note that for  
185 the later condition, 2,3-butanediol was not completely depleted ( $\leq 0.6$  mM) in the cultures and  
186 hence the cells would not have experienced carbon starvation.

### 188 ***SiaA and SiaB represent a phosphatase/kinase couple that balance the phosphorylation*** 189 ***status of SiaC***

190 The SiaA protein is predicted to be a PP2C-like protein phosphatase (PPM-type)  
191 (<http://www.pseudomonas.com/feature/show/?id=103077&view=functions>). A distinctive feature  
192 of these phosphatases is their dependency on Mn<sup>2+</sup> or Mg<sup>2+</sup> ions as cofactors and serine and/or  
193 threonine residues in their target protein (<http://www.ebi.ac.uk/interpro/entry/IPR001932>).  
194 Structure-function predictions of SiaB using I-TASSER suggested that SiaB has protein kinase  
195 activity (**Fig 4A**). Notably, SiaC contains a putative phosphorylation site at threonine residue 68  
196 (T68)[74] and as such could represent the target of the predicted protein phosphatase/kinase  
197 activities of SiaA and SiaB. To test this hypothesis, we purified the C-terminal part of SiaA (amino  
198 acids 386-663; SiaA-PP2C; Genbank: NP\_248862) including the putative PP2C-like  
199 phosphatase domain (amino acids 453-662; **Fig 4B**) and SiaB protein from *E. coli* by metal-affinity



200 chromatography (**Fig S2**). Similarly, the SiaC protein was purified from *E. coli* or  $\Delta siaA$  lysates  
201 and was subsequently analyzed by shotgun peptide-mass spectrometry (PMS; **Table S1**). For  
202 the SiaC variant purified from *E. coli*, the T68-containing peptide (peptide [LLYLNTSSIK]) was  
203 identified predominantly by fragment-masses derived of precursor ions of the parental, non-  
204 phosphorylated peptide. In addition, the non-phosphorylated peptide was quantified at > 1000  
205 fold lower intensity ( $1.4 \times 10^{11}$  vs.  $4.0 \times 10^{14}$  peak area) by precursor ions of its phosphorylated  
206 analogue; hence, these preparations contained almost exclusively non-phosphorylated protein.  
207 In contrast, the SiaC variant purified from  $\Delta siaA$  cell lysates (SiaC<sup>P</sup>), the corresponding  
208 phosphorylated peptide was found at a higher abundance than the non-phosphorylated peptide  
209 ( $7.8 \times 10^6$  vs.  $3.2 \times 10^6$  peak area). Hence, these preparations contained relevant amounts of  
210 phosphorylated SiaC<sup>P</sup> at position T68 (71.27% of total peak area). Incubation of SiaB (0.5  $\mu$ M)  
211 alone or with SiaC<sup>P</sup> (5  $\mu$ M) did not consume ATP, whereas incubation of SiaB with SiaC (5  $\mu$ M)  
212 consumed 4.45  $\mu$ M ATP, indicating kinase activity of the SiaB protein in the presence of SiaC  
213 (**Fig 4C**).

214 Activity measurements using a malachite-green assay (**Fig 4D**) revealed phosphatase activity of  
215 SiaA-PP2C in the presence of SiaC<sup>P</sup> (5  $\mu$ M; prepared by incubating SiaB/SiaC protein mixture in  
216 the presence of MgCl<sub>2</sub>/ATP) and Mg<sup>2+</sup> (4.74  $\mu$ M) or Mn<sup>2+</sup> (4.52  $\mu$ M) ions. No activity was observed  
217 when SiaA was incubated with SiaC. Notably, reactions in which SiaB and SiaC were incubated  
218 together with SiaA-PP2C (0.5  $\mu$ M), the consumption of ATP was increased (6.42  $\mu$ M and 6.57  $\mu$ M  
219 in the presence of 10  $\mu$ M ATP and to 12.01  $\mu$ M and 12.39  $\mu$ M in the presence of 25  $\mu$ M of ATP,  
220 respectively) compared to SiaB with SiaC in the absence of SiaA-PP2C (**Fig 4C**). Similarly,  
221 incubation with SiaA-PP2C, SiaB, and SiaC or SiaC<sup>P</sup> in the presence of Mg<sup>2+</sup> ions and 25  $\mu$ M ATP  
222 also indicated much higher phosphatase activities compared to SiaA-PP2C with SiaC<sup>P</sup> in the  
223 absence of SiaB (13.44  $\mu$ M and 16.76  $\mu$ M, respectively) (**Fig 4D**). As neither activity correlates  
224 with the amount of SiaC/SiaC<sup>P</sup> added (5  $\mu$ M), these experiments indicate that SiaA-PP2C and

225 SiaB are both enzymatically active on their respective substrates, catalysing a cycle of SiaC  
226 phosphorylation and de-phosphorylation in dependency of ATP availability.  
227 To determine the exact site of phosphorylation, we performed kinase (SiaB + SiaC) and  
228 phosphatase (SiaA-PP2C + SiaC<sup>P</sup>) assays and analysed the SiaC/SiaC<sup>P</sup> protein by PMS after  
229 gel purification (**Fig 4E** and **Table S1**). For SiaB with SiaC in the presence of ATP, we observed  
230 a 1000-fold increase of the phosphorylated T68-containing peptide (peptide [LLYLNTSSIK])  
231 compared conditions in which ATP was omitted from the assay ( $1.5 \times 10^9$  vs.  $1.3 \times 10^6$  peak area).  
232 Incubation of SiaA-PP2C with SiaC<sup>P</sup> resulted in > 10-fold decrease in the phosphorylated peptide  
233 (LLYLNTSSIK) compared to the control incubation without SiaA-PP2C added. Hence, the PMS  
234 data obtained from these enzyme assays provide direct evidence that T68 of SiaC is a target for  
235 phosphatase and kinase activity of SiaA and SiaB, respectively.

236

### 237 ***The SiaA activity can be inhibited by fumonisin B1***

238 Given that loss of SiaA function results in poor aggregate and biofilm formation via control of the  
239 phosphorylation status of SiaC, SiaA function may represent a novel target for biofilm control  
240 through antagonists. Fumonisin B1 is a well-established inhibitor of PP2C type phosphatases  
241 [75]. To determine if fumonisin B1 can interfere with SiaA activity, we incubated purified SiaA-  
242 PP2C (50 µg/mL) in the presence of different concentrations of the inhibitor as well as varied  
243 concentrations of the substrate, pNPP (**Fig 4F**). At increasing concentrations, fumonisin B1 was  
244 indeed inhibitory of SiaA phosphatase activity dependent on the concentration of substrate used.  
245 In the presence of 0.025 mM fumonisin B1, SiaA-PP2C retained 60.31-79.25% of its activity as  
246 compared to the untreated control. At higher fumonisin B1 concentration of 0.1 mM SiaA-PP2C  
247 activity was inhibited in a pNPP dependent manner, with 35.48% activity remaining with 0.5 mM  
248 pNPP, 39.37% activity with 1 mM pNPP, 52.97% activity with 2 mM pNPP and 64.30% activity  
249 retained with 5 mM pNPP used. At 0.5 mM fumonisin, there was complete inhibition of SiaA-PP2C  
250 activity across all pNPP concentrations.

251

252 ***Crystal structure of the PP2C domain of SiaA reveals a homodimer***

253 To further characterise the PP2C domain of SiaA (SiaA-PP2C), the structure of the protein with  
254 Mg<sup>2+</sup> ions at the active site was determined (PDB ID: 6K4E). Native crystals of SiaA-PP2C were  
255 obtained in conditions A11 (0.03 M MgCl<sub>2</sub>, 0.03 M CaCl<sub>2</sub>, 0.1 M tris, 0.1 M BICINE, 20 % v/v  
256 glycerol, 10 % w/v PEG 40000, pH 8.5) from Morpheus (Molecular Dimensions) with space group  
257 of P2<sub>1</sub>2<sub>1</sub>2<sub>1</sub> and diffracted to a resolution of 2.1 Å. Phases were obtained using single-wavelength  
258 anomalous dispersion (SAD) with a single SeMet derivative crystal. Statistics of the data  
259 collection, structure determination and refinement are displayed in **Table S2**. The SiaA-PP2C  
260 domain is arranged as a tight dimer in the crystal asymmetric unit. The electron density map of  
261 SiaA-PP2C allowed unambiguous tracing of residues 407 to 663 for monomer A and 409 to 663  
262 for monomer B. However, no clear electron density was present for residues 521-528 and 578-  
263 581 of chain A and residues 522-527 and 577-579 of chain B, indicating a high degree of flexibility  
264 in these solvent-exposed loops regions. The SiaA-PP2C monomer adopts the canonical α-β-β-α  
265 fold first described for the human PPM1A [76] and subsequently found in several other  
266 phosphatases [77,78] (**Fig 5A**). The core structure of the SiaA-PP2C monomer is a β-sandwich  
267 composed of two antiparallel β-sheets each comprising five β-strands. The active site is at the  
268 apex of the β-sheet structure (**Fig 5A, B and D**). This core structure is flanked on the N-terminal  
269 side by helices α1-α4 and on the C-terminal end by helices α5-α7, forming a four-layered αββα  
270 structure. The two monomers interact extensively with each other through residues projecting  
271 from helices α1, α2 and α3, forming a compact homodimer that buries a total solvent accessible  
272 area of 1392 Å<sup>2</sup> (**Fig 5B**). Consistently, in size-exclusion chromatography, instead of monomer  
273 (~33 kDa), SiaA-PP2C eluted as a 66 kDa dimer, suggesting SiaA exists mainly as dimer in  
274 solution (**Fig 5C**). The homodimer presents two concave surfaces that are likely to accommodate  
275 the incoming substrates (**Fig 5D**).

276 An automated search of 3D structures similar to SiaA-PP2C, using the Dali server  
277 ([ekhidna2.biocenter.helsinki.fi/dali](http://ekhidna2.biocenter.helsinki.fi/dali)), returned PP2C-type phosphatases as the top matches, the  
278 best of which was Rv1364C (PDB code: 3KE6, chain A) from *Mycobacterium tuberculosis* with a  
279 Z score of 23.6 and a RMSD of 2.2 Å for 210 superimposed  $\alpha$ -carbon atoms. Despite a very low  
280 overall amino-acid sequence identity (17%), these structures share a conserved fold and several  
281 strictly conserved active site residues with SiaA-PP2C: D457, D474, G477, D600, G601 and  
282 D653 (**Fig 5E** and **Fig S2**). A structural comparison of the active site of SiaA-PP2C with the active  
283 site of the phosphatase domain of Rv1364C is shown in **Fig 5F**. The two  $Mg^{2+}$  ions labelled as  
284 M1 and M2 directly involved in the catalytic mechanism are coordinated by oxygen atoms from  
285 three evolutionary conserved aspartate residues and occupy equivalent positions in SiaA-PP2C  
286 compared to the two  $Mn^{2+}$  ions found in the Rv1364C active site.  $Mg^{2+}$  ion was placed here  
287 because 0.03 M  $MgCl_2$  was present in crystallization buffer, and hence it does not indicate SiaA-  
288 PP2C's preference for metal ions.  $Mn^{2+}$  and  $Mg^{2+}$  has both been reported as ligand of PP2C, and  
289 it is possible that  $Mn^{2+}$  and  $Mg^{2+}$  both function as co-factor of SiaA-PP2C. Metal-coordinating  
290 residues are all conserved except C475 of SiaA-PP2C, which interacts with metal ion M2 through  
291 its carbonyl oxygen (**Fig 5E** and **F**).

292 Compared to Rv1364C, which only has two bound metal ions, a third  $Mg^{2+}$  ion (M3) was found in  
293 SiaA-PP2C coordinated by D600 and with an incomplete octahedral coordination shell. D604 and  
294 D534 assist in stabilization of M3 through formation of hydrogen bond with M3-coordinating water  
295 molecules. Given the structural similarity with PP2C [76], an  $S_N2$  mechanism is the most plausible  
296 whereby the water molecule bridging M1 and M2 (**Fig 5E**) performs a nucleophilic attack of the  
297 phosphorus atom from the phosphate bound to the threonine target residue. However, M3 could  
298 also play a direct role in the catalytic activity, as was recently proposed for the human PPM1A  
299 protein, a negative regulator of cellular stress response pathways [79,80]. Further study is needed  
300 to investigate whether a third metal ion is present in all PP2C. We note that near the entrance of  
301 the active site, a hydrophobic pocket lined with residues I554, V564, L603, F619 and A620

302 constitutes a potential site for the design of inhibitors (**Fig 5D and G**). Another distinct feature of  
303 SiaA-PP2C is a flexible loop located between  $\beta 7$  and  $\beta 8$ , whereas a Flap subdomain, which has  
304 been reported to aid in substrate specificity, is present at the equivalent position in human PPM1A  
305 and many other PP2C-type phosphatases [80] (**Fig 5H**). Therefore, this shorter yet flexible loop  
306 might contribute to the substrate specificity of SiaA-PP2C.

### 308 ***Crystal structure of SiaC reveals similarity with anti-sigma factor antagonists***

309 To gain insights about SiaC, its crystal structure was determined in this study. Native crystals of  
310 SiaC were grown in C6 condition of the JCSG+ kit from Molecular Dimensions (0.1 M  
311 Phosphate/citrate, pH 4.2, 40% (v/v) PEG 300), with space group I222 and diffracted to a  
312 maximum resolution of 1.7 Å. The structure (PDB ID: 6K4F) was determined by SAD using SeMet  
313 derivative crystals (**Table S2**).

314 Clear electron density maps allowed complete tracing except for residues 101-103, which are  
315 located in the flexible loop between the  $\alpha 3$  helix and  $\beta 5$  strands. The SiaC protein comprises six  
316  $\beta$ -strands arranged in a mixed parallel/antiparallel fashion and three  $\alpha$ -helices (**Fig 6A**). A  
317 hydrophobic pocket next to T68 is formed by residues L61 and L63 projecting from  $\beta 4$ , W95 from  
318  $\beta 5$ , I71 and M74 from  $\alpha 2$ , L107 and F111 from  $\alpha 3$  while L66 belongs to the  $\beta 4$ - $\beta 5$  loop (**Fig 6B**  
319 and **C**). Dali server was used to search for protein structures that are most similar to SiaC crystal  
320 structure, and an anti-sigma factor antagonist from *Mycobacterium paratuberculosis* (PDB ID:  
321 4QTP; gene ID MAP\_0380; **Fig 6D**) was identified as the closest homologue (Z score of 9.0, an  
322 amino-acid sequence identity of 10% and a RMSD of 2.8 Å over the  $\alpha$ -carbon atoms of 117  
323 residues). Despite sharing very low sequence identity, a closer examination of both structures  
324 reveals a conserved overall topology with several unique features, especially at  $\beta 3$ ,  $\beta 4$  strands  
325 and  $\alpha 3$  helix that are longer in 4QTP compared to SiaC. These variations are probably related to  
326 differences in the ability to establish protein-protein interactions. Nonetheless, their target

327 phosphorylation sites, T68 for SiaC and S58 for 4QTP, are both located at the N-terminus of helix  
328  $\alpha 2$ .

329 It is worth mentioning that our SiaC crystal structure not only agrees with the SiaC structure  
330 published by Chen et al. [73], but also provides more details at 1.7Å resolution. A 2SiaB:2SiaC  
331 complex was suggested by size-exclusion chromatography when SiaB and SiaC were mixed in  
332 equal molar ratio and incubated at room temperature for 1 h (**Fig 6E**). Instead of two individual  
333 peaks (one consists of SiaB and one consists of SiaC), a single peak containing the complex was  
334 observed. This 2SiaB:2SiaC complex model is consistent with the recently reported crystal  
335 structure of the SiaB/SiaC complex [73]. When the SiaB/SiaC mixture was supplemented with 10  
336 mM ATP and 20 mM MgCl<sub>2</sub> prior to size-exclusion chromatography, the complex disappeared  
337 and SiaB and SiaC<sup>P</sup> eluted as two individual peaks. The phosphorylation state of SiaC<sup>P</sup> was  
338 subsequently confirmed by LC-MS. As such, our data demonstrate that SiaB binds tightly to SiaC  
339 but quickly dissociation from SiaC<sup>P</sup> after phosphorylation.

340

#### 341 ***Molecular Docking and MD simulation of SiaC<sup>P</sup> with the phosphatase domain of SiaA***

342 As shown above, the SiaB/SiaC complex quickly dissociates upon phosphorylation. Since SiaA-  
343 PP2C targets SiaC<sup>P</sup>, we wanted to study the interaction between SiaA and SiaC during the  
344 dephosphorylation reaction. Therefore, we performed a MD simulation on SiaA binding to SiaC  
345 and to SiaC<sup>P</sup>. The SiaA/SiaC<sup>P</sup> complexes were predicted by molecular docking of SiaA-PP2C  
346 dimer to SiaC and to SiaC<sup>P</sup> using ZDOCK, followed by 60 ns of MD simulation (**Fig 7A and B**).

347 These simulations suggest that the phosphorylated pT68 is required for productive binding to the  
348 catalytic site of SiaA-PP2C, where it remains efficiently bound via the catalytic Mg<sup>2+</sup> ion M3 and  
349 the bridging water molecules surrounding it (**Fig 7C-E**). This result is consistent with the  
350 experimental observation that only pT68 in SiaC<sup>P</sup> constitutes the substrate for SiaA-PP2C activity.

351 In contrast, the non-phosphorylated T68 dissociated from the catalytic site in less than 15 ns of  
352 simulation, suggesting that the interaction of SiaC with SiaA is weak upon dephosphorylation.

353 Based on the simulated model, several key interactions that could contribute to substrate  
354 specificity of SiaA-PP2C were identified. First, R652 stabilizes the positively charged phosphate  
355 group of pT68 through the formation of a salt bridge (**Fig 7F**). In addition, the flexible loop between  
356  $\alpha 5$  and  $\alpha 6$  of SiaA inserts into a shallow pocket located between  $\alpha 2$ ,  $\alpha 3$ ,  $\beta 4$ ,  $\beta 5$  and  $\beta 6$  of SiaC<sup>P</sup>  
357 and establishes hydrophobic contacts with L61, L66, I71, M74, M75, L78, W95, L107 and F111  
358 through F612 (**Fig 7G**). Notably, the salt bridge identified between R618 and E609 of SiaA is likely  
359 to restrain the orientation of the flexible loop between  $\alpha 5$  and  $\alpha 6$ , which could favour interaction  
360 with SiaC<sup>P</sup>. Notably, F612 was recently found to be deleted in the SiaA protein from a non-  
361 aggregative mutant ( $\Delta siaA$ ; G611F612; SiaA-PP2C\*)[70].

362 A homology model of SiaA-PP2C\*, (**Supplementary zip-file**) using SWISS-MODEL  
363 (<https://swissmodel.expasy.org/>) with the SiaA-PP2C crystal structure as template (GMQE =0.98,  
364 QMEAN = -0.54) confirmed that the deleted amino acids G611F612 most likely impacts the  
365 orientation of the flexible loop between  $\alpha 5$  and  $\alpha 6$ , and confirmed that F612 seems to be important  
366 for the interaction with the hydrophobic pocket of SiaC<sup>P</sup> (**Fig 7H1-I2**). As such, a stable SiaC<sup>P</sup>-  
367 SiaA-PP2C\* complex seems unlikely to form, which would explain the non-aggregative phenotype  
368 of the  $\Delta siaA$  mutant strain due to an impaired enzymatic activity towards SiaC<sup>P</sup>.

## 369 Discussion

370 The SiaA and/or SiaD proteins are essential for the formation of macroscopic aggregates during  
371 growth in the presence of the toxic surfactant SDS or the ROS-generating biocide tellurite in a c-  
372 di-GMP manner [7,70,72]. This active and energy requiring response may represent an adaptive  
373 survival strategy as the corresponding aggregates were found to protect cells of the same, as well  
374 as other, species in mono- and mixed culture experiments [11,71,81]. Here, we show that the  
375 SiaABCD proteins play a key role in cellular aggregation and dispersal of *P. aeruginosa* in  
376 response to carbon availability in the environment. This is intriguing in the context of lung  
377 colonisation by *P. aeruginosa* given the dynamic changes in the sources and supply of carbon  
378 substrates available in the lung, including but not limited to, glucose [82], short-chain fatty acids  
379 [83,84], ethanol and 2,3-butanediol [85–87]. Notably, ethanol and 2,3-butanediol have recently  
380 been reported to influence microbial colonisation of epithelial cells or the persistence of microbes  
381 during infection [13,88,89]. It is thus possible that the SiaABCD signalling pathway is not only  
382 involved in the regulation of cellular aggregation but also has an impact on the virulence of *P.*  
383 *aeruginosa*. This hypothesis is supported by several observations:

- 384 i) A diverse set of regulatory systems involved in biofilm formation and/or virulence are  
385 interconnected with the SiaABCD pathway. These include the transcriptional regulators AmrZ  
386 and FleQ or the posttranscriptional regulatory systems RsmA/*rsmY/rsmZ*, RsmN and CRC  
387 [72,90–94].
- 388 ii) SiaD modulates the community structure and competitiveness of *P. aeruginosa* cells within  
389 dual-species biofilms with cells of *Staphylococcus aureus* and impacts pyoverdine and  
390 pyocyanin production [7,71,95].
- 391 iii) SiaD was identified as one of the DGCs capable of initiating the “Touch-Seed-and-Go”  
392 virulence program by activating the c-di-GMP receptor FimW [96]. This activation leads to the  
393 attachment of cells and the subsequent induction of virulence traits through asymmetric cell



394 division, finally promoting efficient tissue colonization, localised host damage and fast  
395 dissemination of the infection.

396 With our study, we demonstrated that the protein phosphatase SiaA and its kinase counterpart  
397 SiaB target the protein SiaC at threonine 68 (T68) and provide evidence that the SiaABC proteins  
398 make use of a partner switch mechanism to balance cellular aggregation in response to carbon  
399 availability. A partner switch system (PSS) typically involves a PP2C phosphatase (SiaA), an anti-  
400 sigma factor with kinase activity (SiaB) and anti-sigma factor antagonist representing the target  
401 for phosphorylation (SiaC). In line with such a mechanism, the phosphorylation status of the  
402 proposed anti-sigma factor antagonist SiaC is crucial for the switch to occur. In addition to the  
403 sequestration of an alternative sigma factor, partner switch systems have recently been found to  
404 regulate important physiological traits also by affecting enzymatic activities involved in cellular  
405 signalling cascades through direct protein-protein interactions.

406 In *P. aeruginosa*, the HptB-HsbR-HsbA system was shown to promote DGC activity of HsbD  
407 following its interaction with the phosphorylatable anti-sigma factor antagonist HsbA to regulate  
408 biofilm formation and swimming motility [97]. More recently, a PSS was shown to be involved in  
409 mixed-linkage  $\beta$ -glucan synthesis in *S. meliloti* through the induction of c-di-GMP levels [98]. In  
410 this system, the Ser/Thr-specific phosphatase/kinase couple BgrU/BgrW controls the  
411 phosphorylation status of the BgrV protein and hence controls the activity of the DGC BgrR.  
412 Finally, in *Moorella thermoacetica* the RsbT-like switch kinase MtT was found to bind to and  
413 attenuate the activity of the DGC MtG (PDB: 3ZT9) after phosphorylation of the RsbS-like  
414 stressosome scaffold protein Mts (Mts-P [PDB: 3ZTB]). Notably, SiaD activity exhibits the same  
415 phenotype as loss of SiaC function (this study), the *siaABCD* genes are co-regulated in an operon  
416 [71] and SiaD overexpression was found to be incapable of complementing the non-aggregative  
417 phenotype of the  $\Delta$ *siaA* mutant strain whereas other DGCs could [70]. Based on these facts, one  
418 can speculate that the SiaABC partner switch functions to regulate SiaD mediated c-di-GMP  
419 biosynthesis through the phosphorylation status of SiaC. In one such scenario, the activation of

420 SiaA would shift the equilibrium of SiaC/SiaC<sup>P</sup> towards the unphosphorylated form of SiaC, which  
421 subsequently interferes with SiaD activity, leading to increased c-di-GMP production and  
422 subsequently biofilm formation. Such a scenario would explain the strong aggregative phenotype  
423 of the SiaB mutant observed in this and previous studies [99]. As a negative feedback response,  
424 SiaC<sup>P</sup> has an increased binding affinity towards SiaA, which would lead to a negative impact on  
425 SiaD activity through the dephosphorylation of T68 and increased binding to SiaB.

426 During the publication of our preprint [100] and the per-review process for this manuscript, Chen  
427 et al. [73] published a similar data-set that showed direct interaction of SiaC with SiaB and SiaD  
428 based on two-hybrid data and co-crystallization of the SiaB-SiaC complex as well as activation of  
429 SiaD through SiaC binding. As such, that study is complementary to our data and strongly  
430 supports a model that the SiaABC partner switch integrates environmental information, such as  
431 carbon availability and surfactant stress, to control biofilm formation through the modulation the  
432 activity of SiaD through the phosphorylation status of SiaC.

433 Given their importance in regulating aggregation and biofilm formation, the PP2C domain of SiaA  
434 and the putative anti-sigma factor antagonist SiaC may represent novel targets for the  
435 development of biofilm interference drugs. The PP2C-type phosphatase SiaA, while conserved  
436 in prokaryotes and eukaryotes, is structurally unique. A Flap sub-domain, suggested of being  
437 involved in substrate interaction and specificity, has been reported in human PPM1A and many  
438 other PP2C-type phosphatases [80]. SiaA-PP2C lacks the Flap sub-domain and instead has a  
439 long loop between  $\beta 7$  and  $\beta 8$  that does not seem to interact with SiaC<sup>P</sup> according to MD  
440 simulations. However, the flexible loop between  $\alpha 5$  and  $\alpha 6$  might aid in substrate specificity of  
441 SiaA by interacting with the hydrophobic pocket of SiaC near the phosphorylation site. Although  
442 further studies are needed to confirm this finding, the fact that the phosphatase domain of the  
443 mutant allele SiaA-PP2C\* has a deletion in G611F612, of which the latter residue seems to be  
444 crucial for the interaction with SiaC, is supportive of this hypothesis. Thus, this flexible loop in  
445 SiaA could be exploited for drug design to interfere with SiaA/SiaC<sup>P</sup> interaction and hence, block

446 downstream induction of biofilm formation through the inhibition of SiaC<sup>P</sup> dephosphorylation. In  
447 addition, we demonstrated that the phosphatase inhibitor fumonisin B1 [75] was capable of  
448 completely inhibiting the activity of SiaA *in vitro*. Fumonisin B1 is also known to inhibit ceramide  
449 synthase [101], and it was proposed to work by establishing electrostatic interaction between  
450 negatively charged tricarboxylic groups and positively charged active site. Here we speculate that  
451 fumonisin B1 might inhibit SiaA through a similar mechanism, namely by electrostatic interactions  
452 between the negatively charged tricarboxylic groups of fumonisin B1 and the positively charged  
453 metal ions of SiaA, thus blocking the active site. In addition to SiaA inhibition, SiaC also represents  
454 an exciting target for interference, as it is structurally most similar to bacterial anti-sigma factor  
455 antagonists with little homology with human proteins. The hydrophobic pocket next to the  
456 phosphorylation site of SiaC is of particular interest, as it seems to be involved in the stability of  
457 the SiaA/SiaC<sup>P</sup> interaction. In addition, a large patch of negatively charged surface is present at  
458  $\alpha 2$  and  $\alpha 3$  near the hydrophobic pocket (**Fig 6C**), and could thus be useful for drug design as  
459 potential anchor points.

460 In summary, the presented work provides a deeper understanding of the SiaABCD mediated  
461 regulation by expanding the fundamental genetic and biochemical mechanisms that control  
462 cellular aggregation in response to carbon availability. Together with the insights into the catalytic  
463 and regulatory mechanisms of the protein-phosphatase family-2C (PP2C) domain of SiaA and of  
464 the SiaC protein gained by our structural analysis, the present study might facilitate the  
465 development of future anti-biofilms drugs based on a signal interference strategy, which are  
466 desperately needed to combat the rising crisis due to antibiotic resistance.

## 467 **Materials and Methods**

### 468 ***Strains and growth conditions***

469 Bacterial strains (**Table S3**) were maintained on Lysogeny Broth (LB) (Bertani 1951) solid medium  
470 (1.5% agar w/v) and routinely cultured in 10 mL LB medium in 50 mL Falcon tubes (Greiner Bio-  
471 one) or M9 medium (47.6 mM Na<sub>2</sub>HPO<sub>4</sub>, 22 mM KH<sub>2</sub>PO<sub>4</sub>, 8.6 mM NaCl, 18.6 mM NH<sub>4</sub>Cl, 2 mM  
472 MgSO<sub>4</sub>, 0.1 mM CaCl<sub>2</sub>, 0.03 mM FeCl<sub>2</sub>) with shaking at 200 rpm and incubation at 37°C or 30°C.

### 473 ***Strain construction***

474 To create the *siaB* and *siaC* mutant strains, the Tet<sup>r</sup> IS*phoA/hah* transposon insertion located in  
475 the *siaB* and *siaC* genes was transferred into the wild type strain by E79tv2 phage transduction  
476 [24], using the PW1292 and PW1290 strains from the University of Washington Genome Centre  
477 as the source of the transposon [102] (**Table S3**). Following transduction, Tet<sup>r</sup> resistant strains  
478 containing IS*phoA/hah* insertions were cured of the antibiotic resistance marker by Cre/*loxP*  
479 recombination mediated excision of the tetracycline resistance cassette. For expression of the  
480 Cre recombinase, the pCre1 plasmid was introduced into the *P. aeruginosa* mutant strain  
481 harbouring the IS*phoA/hah* insertion by conjugation using biparental mating with S17-λpir. An  
482 overnight culture of the *P. aeruginosa* recipient strain was grown in 10 mL LB at 42°C with shaking  
483 at 50 rpm, while the *E. coli* donor strain was grown in 10 mL LB at 37°C with shaking at 150 rpm.  
484 Optical density measurements were used to provide 2 × 10<sup>9</sup> cells of the recipient strain and 1 ×  
485 10<sup>9</sup> cells donor strain, where an OD<sub>600</sub> = 1 is approximately 1 × 10<sup>9</sup> cells/mL. Cells were washed  
486 twice in 1 mL pre-warmed LB with centrifugation for 30 sec at 10,000 × *g* at room temperature  
487 (Heraeus instruments; biofuge pico). Finally, the cells were combined in 100 µL LB pre-warmed  
488 to 37°C, spotted on to a hydrophilic mixed cellulose 0.45 µm sterile filter (Pall Corporation) on a  
489 LB plate pre-warmed to 37°C and incubated at 37°C for 8 h for transfer. Following incubation, the  
490 filter was transferred to a 50 mL Falcon tube and the bacteria were resuspended in 1 mL 0.9%  
491 NaCl (w/v) by vortexing. Serial dilutions were performed in M9 medium and subsequently plated  
492 on Pseudomonas Isolation Agar (PIA, Difco) plates to counter-select against *E. coli* cells and to

493 determine the colony forming units (CFU/mL). Based on the CFU results, appropriate dilutions  
494 were selected to ensure that 50-100 colonies from the initial transduction were spread on to the  
495 PIA agar plates. After growth for 14-16 h at 37°C, single colonies of the exconjugants were  
496 patched on to both selective and non-selective agar plates to test for tetracycline sensitivity. The  
497 correct site of insertion and loss of the tetracycline resistant cassette was confirmed by PCR and  
498 sequencing.

### 499 **Plasmid construction**

500 Cloning of the C-terminal part of SiaA (SiaA-PP2C), SiaB, and SiaC were carried out using  
501 ligation-independent cloning methods as described in Savitsky et al. [103]. The gene regions  
502 encoding SiaA-PP2C (amino acids 386-663; Genbank ID: NP\_248862), SiaB (Genbank-ID:  
503 248862), SiaC (Genbank-ID: NP\_248860) were amplified via PCR of genomic DNA of the  
504 wildtype strain with appropriate primers (**Table S4**). Amplified sequences were treated with T4  
505 DNA polymerase and dCTP. The vector pNIC28-Bsa4 was digested with *BsaI* whereas the vector  
506 pNIC-CTHF was digested with *BfuAI*. The vectors were then purified and subsequently treated  
507 with T4 DNA polymerase and dGTP. Treated vectors and inserts were mixed and annealed for  
508 10 min at room temperature before being used for transformation of Mach1 chemically competent  
509 *E. coli* cells leading to the expression vectors pNIC[SiaA], pNIC[SiaB] and pNIC[SiaC],  
510 respectively. For protein expression, the construct was retransformed into *E. coli* BL21(DE3)  
511 Rosetta T1R competent cells. Small scale analytical expression screens were then carried out to  
512 verify expression of the protein and its likelihood for success in large scale purification.  
513 Transformed *E. coli* BL21(DE3) Rosetta T1R were grown at 37°C in 1 mL of Terrific Broth (TB)  
514 (1.2% w/v tryptone, 2.4% w/v yeast extract, 0.5% v/v glycerol, 89 mM phosphate buffer) to an  
515 OD<sub>600</sub> of ~ 2 -3. The temperature was subsequently reduced to 18°C and protein production was  
516 induced with 0.5 mM Isopropyl-β-D-thiogalactoside (IPTG, Sigma Aldrich) overnight. The cells  
517 were then lysed and subjected to clarification and microscale immobilized metal-ion affinity

518 chromatography (IMAC) to assess the levels of soluble and purifiable target protein from each  
519 clone.

520 For construction pJEM[SiaC], the His6-TEV-*siaC* construct from pNIC[SiaC] was amplified using  
521 Q5 Hot-Start DNA polymerase (New England BioLabs) with the appropriate primer pair (**Table**  
522 **S4**). The primers had 25 bp of homology to the insertion sites in plasmid pJeM1 on each site  
523 (marked as bold text). The eGFP gene in plasmid pJeM1 was excised using *NdeI* and *HindIII* and  
524 replaced with the purified PCR products *via* the one-step isothermal assembly. The constructs  
525 were subsequently transformed into *E. coli* DH5 $\alpha$  (Invitrogen) and the correctness of the cloned  
526 genes was verified by sequencing (GATC Biotech).

### 527 ***Phenotypic characterisation in 12 well plates***

528 For phenotypic characterisation of cultures during growth on 3.5 mM SDS and 22.2 mM glucose,  
529 cell culture treated, 12 well microtiter plates with 2 mL M9 medium were prepared and inoculated  
530 with washed cells from an overnight culture grown in LB medium to an OD<sub>600</sub> = 0.01. Following  
531 incubation at 30°C with shaking at 200 rpm for 18 h the plates were imaged at 1200 dpi using an  
532 Umax Powerlook 1000 flatbed scanner with V4.71 software in a dark room. Images were  
533 normalised using Adobe Photoshop CS5 Software by using the 'match colour' image adjustment  
534 function, with all images normalised to the first image scanned using this experimental format.  
535 Experiments were performed as at least 6 independent replicates and representative images are  
536 shown.

### 537 ***Analytics of supernatants***

538 For glucose quantification, the liquid cultures were filtered through a 0.22  $\mu$ M PES filter (PN 4612,  
539 Pall) and quantified using the GO assay kit (GAGO20, Sigma Aldrich). Briefly, one volume of  
540 sample or standard solution (20  $\mu$ L) was mixed with two volumes of assay reagent (40  $\mu$ L) in a  
541 96 well plate and incubated statically at 37°C for 30 min. Subsequently, the reaction was stopped  
542 by the addition of 12 N H<sub>2</sub>SO<sub>4</sub> (40  $\mu$ L) to the reaction mixture. Glucose concentrations were

543 quantified at 540 nm using a microplate reader (Infinite 200 pro, Tecan). Zero-80 µg/mL glucose  
544 standard solutions were used for the calibration curve.

545 Concentrations of succinate, ethanol and 2,3-butanediol were quantified by a HPLC method using  
546 an Aminex HPX-87H 300 x 7.8 mm ion-exchange column (BioRad, Munich, Germany) heated to  
547 60°C. The eluent was 5 mM H<sub>2</sub>SO<sub>4</sub>, which was delivered to the column by a LC-10ATvp pump  
548 (Shimadzu, Munich, Germany) at a flow rate of 0.6 mL/min. The eluent was continuously  
549 degassed with a DGU-20A3R degassing unit (Shimadzu, Munich, Germany). Samples were  
550 injected using 10 µL with a 234 autosampler (Gilson, Limburg-Offheim, Germany). Resolved  
551 compounds were analysed with a refractive index detector (RID-10A, Shimadzu, Munich,  
552 Germany) and the data processed using the Shimadzu Lab solutions software version 5.81.  
553 Concentrations were finally calculated from calibration curves of the corresponding metabolite of  
554 interest.

### 555 ***Biofilm quantification using crystal violet staining in 24 well plates***

556 A microtitre based crystal violet (CV) staining assay was used to quantify biofilm formation during  
557 growth with various media. Cell culture treated and non-treated 24 well microtiter plates with 800  
558 µL M9 medium were prepared and inoculated with washed cells from an overnight culture grown  
559 in LB medium to an OD<sub>600</sub> = 0.01. M9 medium was supplemented with 22.2 mM glucose, 20 mM  
560 succinate, 40 mM ethanol or 20 mM 2,3-butanediol and incubated at 30°C with shaking at 200  
561 rpm. Following incubation, liquid cultures were removed, pooled and used for quantification of the  
562 carbon source and optical density measurements. The wells of the microtitre plates were then  
563 stained with 900 µL CV solution (0.1% [w/v] stock in water) for 10 min without shaking. After  
564 incubation, the liquid was discarded and the wells of the microtitre plates were washed with 1 mL  
565 Tris-HCl (10 mM; pH 7) containing 0.9 % NaCl (w/v) for 10 min, once without and once with  
566 shaking at 200 rpm. Subsequently, the plates were air dried and the remaining CV was solubilised  
567 by incubation with 1 mL of pure ethanol for 10 min with shaking at 200 rpm. Quantification of CV  
568 was quantified at 595 nm in a microtiter plate reader.

569 **Scanning electron microscopy (SEM)**

570 For SEM, overnight cultures of *P. aeruginosa* strains were prepared in 10 mL LB in 50 mL Falcon  
571 tubes and incubated for 16 h at 30°C with shaking at 200 rpm. Following incubation, cultures were  
572 harvested by centrifugation for 2 min at 16,060 × *g* at room temperature and washed twice in 1  
573 mL of fresh M9 minimal medium. These cells were used to inoculate 50 mL of medium  
574 supplemented with 22.2 mM glucose with an OD<sub>600</sub> = 0.05 in a 250 mL Erlenmeyer flask and  
575 incubated for 5.5 h at 30°C with shaking at 200 rpm. Experiments were performed as three  
576 independent replicates, which were subsequently pooled together. Pooled samples were pipetted  
577 onto poly-L-lysine coated coverslips on the bottom of the wells of a 12 well plate, using enough  
578 culture to create a convex droplet without flooding past the edges of the coverslip. After incubation  
579 for 5 min at room temperature, the coverslips were gently flooded with 2 mL M9 minimal medium,  
580 which was then removed by a pipette. A fixative solution (glutaraldehyde 2.5%, paraformaldehyde  
581 2%, in M9 buffer) was immediately added to the samples and left overnight at 4°C. The relatively  
582 large size of particles formed by the  $\Delta$ *siaB* mutant exceeded the binding capacity of the poly-L-  
583 lysine coverslips, so an alternative fixation process was employed for this strain. After pooling of  
584 the three biological replicates, 3 mL of culture was added to a well of a 12 well plate and  
585 aggregates were allowed to settle to the bottom of the well by gravity. Once the aggregates had  
586 sedimented, the growth medium was removed with a pipette, the cells were washed once in 2 mL  
587 M9 medium by this technique and the fixative solution (glutaraldehyde 2.5%, paraformaldehyde  
588 2%, in M9 buffer) was added to the remaining aggregates. Following overnight incubation in  
589 fixative solution, all samples were washed 3 times in 2 mL of M9 medium with 5 min incubations  
590 at room temperature for each wash. Finally, fixed aggregates of the  $\Delta$ *siaB* mutant were loaded  
591 into a microporous chamber with a 120-200  $\mu$ m pore size (ProSciTech). Samples of both  
592 coverslips and the microporous chamber were then dehydrated by a series of washes with  
593 increasing concentrations of ethanol (30%, 50%, 70%, 80%, 90% and 95%), with 5 min  
594 incubations at room temperature for each step. Samples were then washed 3 times in 100%



595 ethanol with 5 min incubations at room temperature for each step to complete dehydration.  
596 Following dehydration, samples were then dried at the critical point with CO<sub>2</sub> as the transitional  
597 medium (Tousimis, Autosamdri-815). Coverslips were subsequently transferred on to 12.5 mm  
598 SEM stubs using carbon impregnated double-sided adhesive tape and left overnight in a 25°C  
599 oven for de-gassing of the tape. Microaggregates of the  $\Delta siaB$  mutant were removed from the  
600 chamber and placed directly on to the carbon impregnated double-sided adhesive tape on a 12.5  
601 mm SEM stub and left overnight in a 25°C oven for de-gassing of the tape. Samples were then  
602 sputter coated with gold for 2 min 30 sec at 40 mA (Emitech, K550X). Conductive samples were  
603 then analysed by scanning electron microscopy using a spot size of 3, voltage at 15 kV and a  
604 working distance of 10 mm (FEI Quanta 200 ESEM). Multiple fields of view were imaged randomly  
605 for each sample and representative images are shown.

#### 606 ***Particle size experiments using laser diffraction analysis (LDA)***

607 Strains were inoculated in 20 mL LB medium (244620, BD Difco) in a 100 mL Erlenmeyer flask  
608 and incubated at 30°C with 200 rpm shaking. Overnight cultures were subsequently aliquoted to  
609 50 mL falcon tubes and centrifuged at 9500 × *g* for 5 min. The supernatant was discarded and  
610 the pellet was resuspended in 10 mL of M9 medium containing 22 mM glucose. The washing step  
611 was repeated once with the pellet resuspended in 2-5 mL of M9 medium. Finally, the cell  
612 suspensions were passed five times through a 25 gauge syringe needle to disrupt cell aggregates.  
613 The optical density of the suspension was adjusted to OD<sub>600</sub> = 2 and 1 mL was added to 20 mL  
614 of M9 medium supplemented with glucose in an 100 mL Erlenmeyer flask at a final OD<sub>600</sub> = 0.1.  
615 The cultures were subsequently incubated at 30°C with shaking at 200 rpm. Samples were  
616 collected at 3 and 6 h for OD<sub>600</sub> measurement and quantification of glucose concentration. After  
617 6 h of incubation, when glucose was not yet exhausted from the medium, the cultures were  
618 analysed with a particle size analyser (SALD 3101, Shimadzu) using a pump speed of 4.0, and  
619 the accompanying software was used for analysis of the data (WingSALDII version 3.0.0). Particle  
620 sizes of between 0.5-3000 μM were selected for analysis. Calculations were based on water as

621 the dispersing agent with a refractive index of 1.70-020i. Data are presented as the cumulative  
622 percentage of the biovolume of the particles within a given size range (0.5-10  $\mu\text{M}$ , 10-200  $\mu\text{M}$ ,  
623 200-3000  $\mu\text{M}$ ) compared to all particle in the sample. Two biological replicates were analysed  
624 and from each sample, the particle size distribution was quantified with three subsequent  
625 measurements. Data are presented as the mean value of technical triplicates from a single  
626 experiment with the error representing the technical variation.

### 627 ***Protein production and purification from Escherichia coli cells***

628 The production of the C-terminal part of SiaA (SiaA-PP2C), SiaB and SiaC was performed in *E.*  
629 *coli* BL21(DE3) Rosetta T1R cells harbouring the inducible protein production plasmids pNIC28-  
630 Bsa4 and pNIC-CTHF and was performed in a LEX system (Harbinger Biotech). Using glycerol  
631 stocks, inoculation cultures were started in 20-40 mL TB medium supplemented with appropriate  
632 antibiotics. The cultures were incubated at 37°C with 200 rpm shaking overnight. The following  
633 morning, bottles of 0.75-1.5 L TB supplemented with appropriate antibiotics and 100-200  $\mu\text{L}$  of  
634 antifoam 204 (Sigma-Aldrich) were inoculated with the overnight cultures. The cultures were  
635 incubated at 37°C in the LEX system with aeration and agitation through the bubbling of filtered  
636 air through the cultures. When the OD<sub>600</sub> reached ~2, the temperature was reduced to 18°C and  
637 the cultures were induced after 30 to 60 min with 0.5 mM IPTG. Protein expression was allowed  
638 to continue overnight. The following morning, cells were harvested by centrifugation at 15°C and  
639 4000  $\times g$  for 10 min. The supernatants were discarded and the cells were suspended in protein  
640 buffer A (20 mM HEPES pH 7.5, 300 mM NaCl, 5% v/v glycerol, 0.5 mM TCEP) supplemented  
641 with 25  $\mu\text{L}$  of protease inhibitors cocktail III (539134, Calbiochem, Merck).

642 For protein purification, the cell suspensions were sonicated (Sonics Vibra-cell) at 70% amplitude  
643 and a 3 sec on/off cycle for 3min, on ice. The lysate was clarified by centrifugation at 47000  $\times g$   
644 at 4°C for 25 min. The supernatants were filtered through 0.4  $\mu\text{m}$  syringe filters and loaded onto  
645 10 mL spin columns with 2 mL HisPur cobalt resins (89964, Thermo Scientific). For purification,  
646 IMAC columns were first washed with 10 mL protein buffer A and 10 mL of protein buffer A

647 supplemented with 5 mM imidazole. The lysates were then loaded onto IMAC columns and were  
648 allowed to bind to the resins for 30 min at 4°C with mixing with a tube rotator. Subsequently, the  
649 flowthrough was collected and the bound proteins were eluted in a stepwise manner with 2 × 5  
650 mL of protein buffer A containing increasing concentrations of imidazole (10, 25, 50, 100, 250 and  
651 500 mM). After elution, SDS-PAGE was carried out and relevant fractions containing the protein  
652 of interest were pooled and concentrated using Vivaspin 20 filter concentrators (VivaScience) to  
653 a volume of <5 mL. The concentrated sample was injected into a pre-flushed sample loop. Size  
654 exclusion chromatography was carried out using a Biorad FPLC system with a HiLoad 16/60  
655 Superdex 75 pg column (GE healthcare) pre-equilibrated with protein buffer A. Elution peaks were  
656 collected in 1 mL fractions and analysed on SDS-PAGE gels. Relevant peaks were pooled and  
657 concentrated using a filter concentrator. The entire purification was performed at 4°C. The final  
658 protein concentration was assessed by measuring absorbance at 280 nm on a Nanodrop ND-  
659 1000 (Nano-Drop Technologies). The final protein purity was assessed on SDS-PAGE gel (**Fig**  
660 **S2**) and the final protein batches were then aliquoted into smaller fractions, frozen in liquid  
661 nitrogen and stored at -80°C.

662 ***SiaC<sup>P</sup> Preparation by incubating SiaB with SiaC in presence of ATP and size-exclusion***  
663 ***chromatography of SiaB/SiaC mixtures***

664 To generate phosphorylated SiaC<sup>P</sup>, SiaB and SiaC proteins were mixed in equal molar ratio and  
665 supplemented with 10 mM ATP and 20 mM MgCl<sub>2</sub>. The mixture was incubated at room  
666 temperature for 1 h and loaded onto Hiload 16/600 Superdex 200 size exclusion column. SiaC<sup>P</sup>  
667 eluted at approximately 80 mL. Denaturing SDS-PAGE confirmed the size of SiaC<sup>P</sup>, and LC-MS  
668 confirmed the phosphorylated state of SiaC<sup>P</sup>. This SiaC<sup>P</sup> was subsequently used in enzymatic  
669 assays using a malachite-green assay. For size-exclusion chromatography SiaB and SiaC  
670 mixtures were incubated in the absence and presence of ATP or MgCl<sub>2</sub> prior to analysis.

671 ***SiaC<sup>P</sup> production and purification from *Pseudomonas aeruginosa* cells***

672 For the production of the phosphorylated SiaC<sup>P</sup> used the  $\Delta siaA$  mutant harbouring the inducible  
673 protein production plasmids pJEM[SiaC]. Using glycerol stocks, overnight cultures were  
674 inoculated in 20 mL LB medium supplemented with 10 mM phosphate buffer (pH 7.5) and 25 mM  
675 glucose and 50  $\mu$ L/mL kanamycin. The cultures were incubated in 100 mL Erlenmeyer flasks at  
676 30°C with 250 rpm shaking overnight. The following morning, the cultures were used to inoculate  
677 fresh 75 mL medium (500 mL Erlenmeyer flask) at an OD<sub>600</sub> of 0.1. The medium was additionally  
678 supplemented with 0.2% rhamnose (w/v) for induction of SiaC production and cultures were  
679 incubated at 20°C with 250 rpm shaking. After 16 h of incubation, cells were harvested by  
680 centrifugation (9500  $\times$  g; 5 min; 4°C) and resuspended with 7 mL of ice cold HEPES buffer (20  
681 mM HEPES; pH 7.5) containing 300 mM NaCl, 5 mM imidazole, 5% (v/v) glycerol, a phosphatase  
682 inhibitor mix (1 $\times$  concentrated; Pierce™ Phosphatase Inhibitor Mini Tablets), 0.1 mM  
683 Phenylmethylsulfonylfluorid (PMSF); 0.05 mg/mL DNase, and 0.1 mg mL<sup>-1</sup> lysozyme. The cell  
684 suspension was lysed by sonication at 20% amplitude and a 5 s on/off cycle for 5 min, on ice  
685 using a Branson Digital Sonifier 250. The lysate was clarified by centrifugation at 9500  $\times$  g at 4°C  
686 for 10 min. The supernatants were filtered through 0.1  $\mu$ m syringe filters and the SiaC<sup>P</sup> protein  
687 was purified using two GraviTrap™ TALON® columns (GE Healthcare). For purification, TALON®  
688 columns were first washed with 4 mL of 20 mM HEPES (pH: 7.5) buffer containing 300 mM NaCl,  
689 5% Glycerol and 500 mM imidazole. Subsequently, 4 mL of dialysis buffer (20 mM HEPES [pH:  
690 7.5], 300 mM NaCl, 5 % glycerol) and 4 mL of equilibration buffer (20 mM HEPES [pH: 7.5], 300  
691 mM NaCl, 5 % glycerol, 5 mM imidazole), 3.5 mL of lysate was loaded onto each of the columns.  
692 After the columns were loaded, the bound proteins were washed with 4 mL of HEPES buffer (20  
693 mM HEPES [pH 7.5], 300 mM NaCl, 5 % glycerol) with increasing concentrations of imidazole  
694 (10 mM and 25 mM). Finally, the proteins were eluted with 4 mL of HEPES buffer (20 mM HEPES  
695 [pH 7.5], 300 mM NaCl, 5 % glycerol) containing 250 mM of imidazole. After elution, the imidazole  
696 was diluted from the sample (~1:10000) and concentrated to ~ 600  $\mu$ L using two Vivaspin 6 filter

697 concentrators (VivaScience). The protein concentration of the final sample was assessed by  
698 measuring absorbance at 280 nm on a Nanodrop ND-1000 device (Nano-Drop Technologies).  
699 The purification process was assessed with SDS-PAGE gel (**Fig S2**) and the final protein batch  
700 was aliquoted into smaller fractions, frozen in liquid nitrogen and stored at -80°C.

### 701 ***Phosphatase assays with purified SiaA-PP2C and fumonisin B<sub>1</sub>***

702 The phosphatase activity of SiaA-PP2C was assessed using para-nitrophenyl phosphate (pNPP)  
703 or as the target substrate. Phosphatase activity was determined via the production of a  
704 colorimetric para-nitrophenolate product that absorbs strongly at 405 nm. Four times working  
705 solutions of the protein (4×: 200 µg/mL; 1×: 50 µg/mL [~1.49 µM]) were made in water and mixed  
706 with equal volume of 4x pNPP phosphatase assay buffer (1×: 20 mM Tris-HCl [pH 7.5], 150 mM  
707 NaCl, 20 mM MgCl<sub>2</sub>, fumonisin B<sub>1</sub> 0-0.5 mM). Fifty µL of the mixture was then added to each well  
708 in 96 well plates, following which pNPP was added to a final concentration of 0-5 mM to make up  
709 a final volume of 100 µL per well. Phosphatase activity over time was detected via the  
710 measurement of the absorbance at 405 nm using a microtitre plate reader at 37°C (Tecan Infinite  
711 M200 Pro). Initial reaction rates were determined using data from 0-10 min (µM/min). Activity of  
712 SiaA-PP2C in the presence of fumonisin B<sub>1</sub> was calculated as: % Activity = Rate [fumonisin] /  
713 Rate [no fumonisin].

### 714 ***Malachite green phosphate assays and ADP-Glo™ assays***

715 Phosphatase and kinase activities of SiaA and/or SiaB on SiaC and/or SiaC<sup>p</sup> were determined  
716 using the Malachite green phosphate assay kit (Sigma Aldrich) and ADP-Glo™ assay kit  
717 (Promega) respectively. 0.5 µM of SiaA and/or SiaB was incubated with 0-5 µM of SiaC or SiaC<sup>p</sup>  
718 in the reaction buffer (20 mM Tris-HCL [pH 7.5], 150 mM NaCl with addition of 0-25 mM ATP and  
719 0-20 mM MnCl<sub>2</sub> and/or 0-20 mM MgCl<sub>2</sub>) for 1 h at 37°C. Subsequently, the reactions were stopped  
720 and the amount of phosphate released in phosphatase reactions or ATP consumed in kinase  
721 reactions was determined in accordance to the commercial kit protocols. Briefly, for Malachite  
722 green assays, 20 µL of the kit working solution was added to 80 µL of the sample to stop the

723 reaction. The mixture was then incubated at room temperature for 30 min for the generation of a  
724 green complex formed between Malachite Green, molybdate and free orthophosphate.  
725 Measurements were taken at 620 nm using a microplate reader. Readings were then converted  
726 to phosphate measurements using a standard curve. For ADP-Glo™ assays, 20 uL of the ADP-  
727 Glo™ reagent was added to 20 uL of the sample to stop the reaction and deplete remaining ATP.  
728 If enzyme reactions were carried out in the absence of Mg<sup>2+</sup>, MgCl<sub>2</sub> was supplemented to the  
729 mixture to a final concentration of 20 mM. The mixture was incubated at room temperature for 40  
730 min. A second kinase detection reagent was added to the mixture to convert ADP consumed to  
731 ATP and for conversion of the ATP signal to luminescence signals and further incubated for 45  
732 min. Luminescence was measured using a microplate reader and converted to ATP consumed in  
733 kinase reaction using a standard curve generated. At least two independent biological replicates  
734 with technical duplicates were carried out for each enzymatic reaction.

735 ***Shotgun peptide mass spectrometry of SiaC and evaluation of its phosphorylation state at***  
736 ***position threonine 68 as posttranslational modification***

737 Shotgun (fragmentation) peptide mass spectrometry (PMS) was used to evaluate the  
738 phosphorylation state of SiaC at threonine residue 68 (T68)[74], for example after reactions with  
739 recombinant, purified SiaC as substrate for the phosphatase domain of SiaA (SiaA-PP2C) or  
740 kinase SiaB and ATP. For such assays, 20 µg of purified SiaC<sup>P</sup> or SiaC was incubated in the  
741 absence or presence of 20 µg of purified SiaA or SiaB for 2 h at 30°C in suitable assay solution  
742 (see above). Twenty µL were used for the separation of the proteins within the sample using a  
743 15% SDS-PAGE gel [104]. The gel was stained with Coomassie Blue [105] and the SiaC protein  
744 band (17 kDa) was excised from the SDS-PAGE gel, subjected to tryptic digest and the peptides  
745 were analyzed by PMS at the Proteomics Centre of University of Konstanz, as described  
746 previously with minor modifications [106–108]. Here, each sample was analyzed twice on a  
747 Orbitrap Fusion with EASY-nLC 1200 (Thermo Fisher Scientific) and Tandem mass spectra were  
748 searched against an appropriate protein database (retrieved from IMG) using Mascot (Matrix

749 Science) and Proteome Discoverer V1.3 (Thermo Fisher Scientific) with “Trypsin” enzyme  
750 cleavage, static cysteine alkylation by chloroacetamide, and variable methionine oxidation, serine  
751 and threonine phosphorylation.

752 For analysis, the relative abundance of precursor ions was determined for the peptide harboring  
753 the T68 in a non-phosphorylated state (parental peptide [LLYLNTSSIK]) and for the peptide with  
754 corresponding mass-shifts indicative of its phosphorylation (monoisotopic mass-change,  
755 +79.96633 Da; average mass-change +79.9799 Da).

### 756 ***Crystallization, data collection and structure solution***

757 All crystals were cryo-protected with 20% glycerol and frozen in liquid nitrogen and X-ray  
758 diffraction data were collected at beamline PROXIMA 2A of SOLEIL, France. Purified SiaA-PP2C  
759 (386-663) and SeMet SiaA-PP2C (386-663) proteins were concentrated to 25 mg/mL and 24  
760 mg/mL respectively in 20 mM Tris-HCl PH 8, 500 mM NaCl and 1 mM DTT for screening of  
761 crystallization conditions. The best SiaA-PP2C native and SeMet derivative crystals were  
762 obtained from Morpheus A11 and A6 of Molecular Dimension, respectively. SAD phasing and  
763 initial model building was processed with AutoSol from the Phenix package [109] followed by  
764 structure refinement with buster [110] and PDB deposition (6K4E). The SeMet derivative crystal  
765 of SiaC was first obtained in condition Morpheus A9 of Molecular Dimensions at resolution 2.9 Å.  
766 To improve resolution, the His-tag of SiaA protein was removed by TEV cleavage, prior to the  
767 native crystal screen. A native SiaC crystal was obtained in 0.1 M Phosphate/citrate, pH 4.2, 40%  
768 v/v PEG 300 at 1.7 Å. SAD phasing and initial model building was processed with AutoSol from  
769 the Phenix package, followed by structure refinement with Phenix Refine and PDB deposition  
770 (6K4F).

### 771 ***Homology modelling, molecular docking and molecular dynamics (MD) simulations***

772 The homology model of SiaB was generated with the I-TASSER online Server by specifying the  
773 amino acid sequence of SiaB. The homology model of SiaA-PP2C\* was generated with SWISS-  
774 MODEL by providing the amino acid sequence of SiaA-PP2C\* and specifying the SiaA-PP2C

775 crystal structure as template.

776 SiaC<sup>P</sup> model was generated by substituting T68 with pT68 using psfgen in VMD [111]. The model  
777 was then subjected to conjugate gradient energy minimization for 10000 steps using NAMD 2.11  
778 [112]. SiaC<sup>P</sup> was docked to the SiaA dimer by ZDOCK 3.0.2 [113] by specifying pT68 as  
779 interacting residues. Among the top 10 complexes, complex 2 was chosen as the best model  
780 because the pT68 was closest to the bridging water.

781 SiaC<sup>P</sup>-SiaA and SiaC-SiaA dimers were subjected to all-atom, explicit solvent MD simulation  
782 using NAMD 2.11. Each dimer model was simulated in a water box, where the minimal distance  
783 between the solute and the box boundary was 15 Å along all three axes. The charges of the  
784 solvated system were neutralized with counter-ions, and the ionic strength of the solvent was set  
785 to 150 mM NaCl using VMD. The fully-solvated system was subjected to conjugate-gradient  
786 minimization for 10,000 steps, subsequently heated to 310 K, and a 10 ns equilibration with  
787 protein backbone atoms constrained using a harmonic potential of the form  $U(x) = k (x-x_{ref})^2$ ,  
788 where  $k$  is 1 kcal/mol Å<sup>-2</sup> and  $x_{ref}$  is the initial atom coordinates. Finally, 60 ns production  
789 simulations were performed without constraints. All simulations were performed under the NPT  
790 ensemble assuming the CHARMM36 force field for the protein and the TIP3P model for water  
791 molecules. PDB files of the homology models and docking results used for the study are provided  
792 as zipped Supplementary files.

### 793 **Statistical analysis**

794 When needed, experiments with  $n \geq 3$  were analysed using a two-sided students  $t$ -tests ( $\alpha = 0.05$ )  
795 with  $p$ -values  $< 0.05$  interpreted as being significantly different.



## 796 **Acknowledgements**

797 The authors further declare that the research was conducted in the absence of any commercial  
798 or financial relationships that could be construed as a potential conflict of interest. Janosch  
799 Klebensberger would like to thank Prof. Bernhard Hauer for his continuous support. We also  
800 acknowledge beam time allocation at the SOLEIL synchrotron. The MD simulations for this article  
801 were performed on ASPIRE 1 of the National Supercomputing Centre, Singapore  
802 (<https://www.nscg.sg>).

## 804 **Funding**

805 The work of Janosch Klebensberger, Wee Han Poh, Julien Lescar, Jianqing Lin, Scott A. Rice  
806 were partially supported by a joint mobility grant funded by the Federal Ministry of Education and  
807 Research in Germany (FKZ: 01DP17004) and the Ministry of Trade and Industry in Singapore  
808 (SGP-PROG3-023. 2017). We acknowledge financial support from the Singapore Centre for  
809 Environmental Life Sciences Engineering, whose research is supported by the National Research  
810 Foundation Singapore, Ministry of Education, Nanyang Technological University and National  
811 University of Singapore, under its Research Centre of Excellence Programme as well as funding  
812 from the Ministry of Education (tier 1, grant RG154/14).

## 813 References

- 814 1. Stoodley P, Sauer K, Davies DG, Costerton JW. Biofilms as complex differentiated  
815 communities. *Annu Rev Microbiol* [Internet]. 2002;56: 187–209.
- 816 2. Flemming HC, Wingender J, Szewzyk U, Steinberg P, Rice SA, Kjelleberg S. Biofilms: an  
817 emergent form of bacterial life. *Nat Rev Microbiol*. 2016;14: 563–575.
- 818 3. Costerton JW, Lewandowski Z, Caldwell DE, Korber DR, Lappin-Scott HM. Microbial  
819 biofilms. *Annu Rev Microbiol*. 1995;49: 711–745.
- 820 4. Flemming HC, Wuertz S. Bacteria and archaea on Earth and their abundance in biofilms.  
821 *Nat Rev Microbiol*. 2019;17: 247–260.
- 822 5. Flemming H-C, Wingender J. The biofilm matrix. *Nat Rev Microbiol*. 2010;8: 623–633.
- 823 6. McDougald D, Rice SA, Barraud N, Steinberg PD, Kjelleberg S. Should we stay or should  
824 we go: mechanisms and ecological consequences for biofilm dispersal. *Nat Rev Microbiol*.  
825 2012;10: 39–50.
- 826 7. Chua SL, Sivakumar K, Rybtke M, Yuan M, Andersen JB, Nielsen TE, et al. C-di-GMP  
827 regulates *Pseudomonas aeruginosa* stress response to tellurite during both planktonic and  
828 biofilm modes of growth. *Sci Rep*. 2015;5: 10052.
- 829 8. Barraud N, Hassett DJ, Hwang SH, Rice SA, Kjelleberg S, Webb JS. Involvement of nitric  
830 oxide in biofilm dispersal of *Pseudomonas aeruginosa*. *J Bacteriol*. 2006;188: 7344–7353.
- 831 9. Hoffman LR, D’Argenio DA, MacCoss MJ, Zhang Z, Jones RA, Miller SI. Aminoglycoside  
832 antibiotics induce bacterial biofilm formation. *Nature*. 2005;436: 1171–1175.
- 833 10. Gotoh H, Zhang Y, Dallo SF, Hong S, Kasaraneni N, Weitao T. *Pseudomonas aeruginosa*,  
834 under DNA replication inhibition, tends to form biofilms via Arr. *Res Microbiol*. 2008;159:  
835 294–302.
- 836 11. Klebensberger J, Rui O, Fritz E, Schink B, Philipp B. Cell aggregation of *Pseudomonas*  
837 *aeruginosa* strain PAO1 as an energy-dependent stress response during growth with  
838 sodium dodecyl sulfate. *Arch Microbiol*. 2006;185: 417–427.
- 839 12. Schleheck D, Dong W, Denger K, Heinzle E, Cook AM. An  $\alpha$ -proteobacterium converts linear  
840 alkylbenzenesulfonate surfactants into sulfophenylcarboxylates and linear  
841 alkyl-diphenyletherdisulfonate surfactants into sulfodiphenylethercarboxylates. *Appl Environ*  
842 *Microbiol*. 2000;66: 1911–1916.
- 843 13. Chen AI, Okegbe C, Harty CE, Golub Y, Thao S, Ha D-G, et al. *Candida albicans* Ethanol  
844 Stimulates *Pseudomonas aeruginosa* WspR-Controlled Biofilm Formation as Part of a  
845 Cyclic Relationship Involving Phenazines. *PLoS Pathog*. 2014;10: e1004480.
- 846 14. Létouffé S, Audrain B, Bernier SP, Delepierre M, Ghigo J-M. Aerial Exposure to the Bacterial  
847 Volatile Compound Trimethylamine Modifies Antibiotic Resistance of Physically Separated  
848 Bacteria by Raising Culture Medium pH. *MBio*. 2014;5: e00944-13.
- 849 15. Ciofu O, Tolker-Nielsen T, Jensen PO, Wang H, Hoiby N. Antimicrobial resistance,  
850 respiratory tract infections and role of biofilms in lung infections in cystic fibrosis patients.  
851 *Adv Drug Deliv Rev*. 2015;85: 7–23.
- 852 16. Davey ME, O’Toole G A. Microbial biofilms: from ecology to molecular genetics. *Microbiol*  
853 *Mol Biol Rev*. 2000;64: 847–867.
- 854 17. Gilbert P, Maira-Litran T, McBain AJ, Rickard AH, Whyte FW. The physiology and collective  
855 recalcitrance of microbial biofilm communities. *Adv Microb Physiol*. 2002;46: 203–256.

- 856 **18.** Hoiby N, Bjarnsholt T, Givskov M, Molin S, Ciofu O. Antibiotic resistance of bacterial biofilms.  
857 *Int J Antimicrob Agents*. 2010;35: 322–332.
- 858 **19.** Mah T-F, Pitts B, Pellock B, Walker GC, Stewart PS, O'Toole GA. A genetic basis for  
859 *Pseudomonas aeruginosa* biofilm antibiotic resistance. *Nature*. 2003;426: 306–310.
- 860 **20.** Baghal Asghari F, Nikaeen M, Mirhendi H. Rapid monitoring of *Pseudomonas aeruginosa*  
861 in hospital water systems: a key priority in prevention of nosocomial infection. *FEMS*  
862 *Microbiol Lett*. 2013;343: 77–81.
- 863 **21.** Kerr KG, Snelling AM. *Pseudomonas aeruginosa*: a formidable and ever-present adversary.  
864 *J Hosp Infect* 2009;73: 338–344.
- 865 **22.** Williams MM, Armbruster CR, Arduino MJ. Plumbing of hospital premises is a reservoir for  
866 opportunistically pathogenic microorganisms: a review. *Biofouling*. 2013;29: 147–162.
- 867 **23.** Pawar V, Komor U, Kasnitz N, Bielecki P, Pils MC, Gocht B, et al. In Vivo Efficacy of  
868 Antimicrobials against Biofilm-Producing *Pseudomonas aeruginosa*. *Antimicrob Agents*  
869 *Chemother*. 2015;59: 4974–4981.
- 870 **24.** Malone JG, Jaeger T, Spangler C, Ritz D, Spang A, Arrieumerlou C, et al. YfiBNR mediates  
871 cyclic di-GMP dependent small colony variant formation and persistence in *Pseudomonas*  
872 *aeruginosa*. *PLoS Pathog*. 2010;6: e1000804.
- 873 **25.** Pestrak MJ, Chaney SB, Eggleston HC, Dellos-Nolan S, Dixit S, Mathew-Steiner SS, et al.  
874 *Pseudomonas aeruginosa* rugose small-colony variants evade host clearance, are hyper-  
875 inflammatory, and persist in multiple host environments. *PLoS Pathog*. 2018;14: e1006842.
- 876 **26.** Bjarnsholt T, Jensen PO, Fiandaca MJ, Pedersen J, Hansen CR, Andersen CB, et al.  
877 *Pseudomonas aeruginosa* biofilms in the respiratory tract of cystic fibrosis patients. *Pediatr*  
878 *Pulmonol*. 2009;44: 547–558.
- 879 **27.** Staudinger BJ, Muller JF, Halldorsson S, Boles B, Angermeyer A, Nguyen D, et al.  
880 Conditions associated with the cystic fibrosis defect promote chronic *Pseudomonas*  
881 *aeruginosa* infection. *Am J Respir Crit Care Med*. 2014;189: 812–824.
- 882 **28.** Hall-Stoodley L, Costerton JW, Stoodley P. Bacterial biofilms: from the natural environment  
883 to infectious diseases. *Nat Rev Microbiol*. 2004;2: 95–108.
- 884 **29.** Costerton JW, Stewart PS, Greenberg EP. Bacterial biofilms: a common cause of persistent  
885 infections. *Science*. 1999;284: 1318–1322.
- 886 **30.** Parsek MR, Singh PK. Bacterial biofilms: an emerging link to disease pathogenesis. *Annu*  
887 *Rev Microbiol*. 2003;57: 677–701.
- 888 **31.** Lebeaux D, Ghigo JM, Beloin C. Biofilm-related infections: bridging the gap between clinical  
889 management and fundamental aspects of recalcitrance toward antibiotics. *Microbiol Mol Biol*  
890 *Rev*. 2014;78: 510–543.
- 891 **32.** Coggan KA, Wolfgang MC. Global regulatory pathways and cross-talk control  
892 *Pseudomonas aeruginosa* environmental lifestyle and virulence phenotype. *Curr Issues Mol*  
893 *Biol*. 2012;14: 47–70.
- 894 **33.** Jimenez PN, Koch G, Thompson JA, Xavier KB, Cool RH, Quax WJ. The multiple signaling  
895 systems regulating virulence in *Pseudomonas aeruginosa*. *Microbiol Mol Biol Rev*. 2011;76:  
896 46–65.
- 897 **34.** Karatan E, Watnick P. Signals, regulatory networks, and materials that build and break  
898 bacterial biofilms. *Microbiol Mol Biol Rev*. 2009;73: 310–347.
- 899 **35.** Moradali MF, Ghods S, Rehm BHA. *Pseudomonas aeruginosa* Lifestyle: A Paradigm for  
900 Adaptation, Survival, and Persistence. *Front Cell Infect Microbiol*. 2017;7: 39.

- 901 **36.** Vakulskas CA, Potts AH, Babitzke P, Ahmer BMM, Romeo T. Regulation of bacterial  
902 virulence by Csr (Rsm) systems. *Microbiol Mol Biol Rev.* 2015;79: 193–224.
- 903 **37.** Schuster M, Sexton DJ, Diggle SP, Greenberg EP. Acyl-homoserine lactone quorum  
904 sensing: from evolution to application. *Annu Rev Microbiol.* 2013;67: 43–63.
- 905 **38.** Pappenfort K, Bassler BL. Quorum sensing signal-response systems in Gram-negative  
906 bacteria. *Nat Rev Microbiol.* 2016;14: 576–588.
- 907 **39.** Pesavento C, Hengge R. Bacterial nucleotide-based second messengers. *Curr Opin*  
908 *Microbiol.* 2009;12: 170–176.
- 909 **40.** Sajid A, Arora G, Singhal A, Kalia VC, Singh Y. Protein Phosphatases of Pathogenic  
910 Bacteria: Role in Physiology and Virulence. *Annu Rev Microbiol.* 2015;69: 527–547.
- 911 **41.** Römling U, Galperin MY, Gomelsky M. Cyclic di-GMP: the first 25 years of a universal  
912 bacterial second messenger. *Microbiol Mol Biol Rev.* 2013;77: 1–52.
- 913 **42.** Kalia D, Merey G, Nakayama S, Zheng Y, Zhou J, Luo Y, et al. Nucleotide, c-di-GMP, c-di-  
914 AMP, cGMP, cAMP, (p)ppGpp signaling in bacteria and implications in pathogenesis. *Chem.*  
915 *Soc. Rev.* 2013;42: 305–341.
- 916 **43.** Stock AM, Robinson VL, Goudreau PN. Two-component signal transduction. *Annu Rev*  
917 *Biochem.* 2000;69: 183–215.
- 918 **44.** Porter SL, Wadhams GH, Armitage JP. Signal processing in complex chemotaxis pathways.  
919 *Nat Rev Microbiol.* 2011;9: 153–165.
- 920 **45.** Jung K, Fried L, Behr S, Heermann R. Histidine kinases and response regulators in  
921 networks. *Curr Opin Microbiol.* 2012;15: 118–124.
- 922 **46.** Pereira SFF, Goss L, Dworkin J. Eukaryote-like serine/threonine kinases and phosphatases  
923 in bacteria. *Microbiol Mol Biol Rev.* 2011;75: 192–212.
- 924 **47.** Dworkin J. Ser/Thr phosphorylation as a regulatory mechanism in bacteria. *Curr Opin*  
925 *Microbiol.* 2015;24: 47–52.
- 926 **48.** Pirnay JP, De Vos D, Cochez C, Bilocq F, Vanderkelen A, Zizi M, et al. *Pseudomonas*  
927 *aeruginosa* displays an epidemic population structure. *Environ Microbiol.* 2002;4: 898–911.
- 928 **49.** Pirnay JP, Bilocq F, Pot B, Cornelis P, Zizi M, Van Eldere J, et al. *Pseudomonas aeruginosa*  
929 population structure revisited. *PLoS One.* 2009;4: e7740.
- 930 **50.** Fazzeli H, Akbar R, Moghim S, Narimani T, Arabestani MR, Ghoddousi AR. *Pseudomonas*  
931 *aeruginosa* infections in patients, hospital means, and personnel’s specimens. *J Res Med*  
932 *Sci.* 2012;17: 332–337.
- 933 **51.** Römling U, Kader A, Sriramulu DD, Simm R, Kronvall G. Worldwide distribution of  
934 *Pseudomonas aeruginosa* clone C strains in the aquatic environment and cystic fibrosis  
935 patients. *Environ Microbiol.* 2005;7: 1029–1038.
- 936 **52.** He K, Bauer CE. Chemosensory signaling systems that control bacterial survival. *Trends*  
937 *Microbiol.* Elsevier Ltd; 2014;22: 389–398.
- 938 **53.** Lapouge K, Schubert M, Allain FH, Haas D. Gac/Rsm signal transduction pathway of  
939 gamma-proteobacteria: from RNA recognition to regulation of social behaviour. *Mol*  
940 *Microbiol.* 2008;67: 241–253.
- 941 **54.** Mikkelsen H, Sivaneson M, Filloux A. Key two-component regulatory systems that control  
942 biofilm formation in *Pseudomonas aeruginosa*. *Env Microbiol.* 2011;13: 1666–81.
- 943 **55.** Motley ST, Lory S. Functional characterization of a serine/threonine protein kinase of  
944 *Pseudomonas aeruginosa*. *Infect Immun.* 1999;67: 5386–94.

- 945 **56.** Mougous JD, Cuff ME, Raunser S, Shen A, Zhou M, Gifford CA, et al. A virulence locus of  
946 *Pseudomonas aeruginosa* encodes a protein secretion apparatus. *Science*. 2006;312:  
947 1526–1530.
- 948 **57.** Mougous JD, Gifford CA, Ramsdell TL, Mekalanos JJ. Threonine phosphorylation post-  
949 translationally regulates protein secretion in *Pseudomonas aeruginosa*. *Nat Cell Biol*.  
950 2007;9: 797–803.
- 951 **58.** Church D, Elsayed S, Reid O, Winston B, Lindsay R. Burn wound infections. *Clin Microbiol*  
952 *Rev*. 2006;19: 403–434.
- 953 **59.** Almagro P, Salvado M, Garcia-Vidal C, Rodriguez-Carballeira M, Cuchi E, Torres J, et al.  
954 *Pseudomonas aeruginosa* and mortality after hospital admission for chronic obstructive  
955 pulmonary disease. *Respiration*. 2012;84: 36–43.
- 956 **60.** Govan JR, Deretic V. Microbial pathogenesis in cystic fibrosis: mucoid *Pseudomonas*  
957 *aeruginosa* and *Burkholderia cepacia*. *Microbiol Rev*. 1996;60: 539–574.
- 958 **61.** Bjarnsholt T. The role of bacterial biofilms in chronic infections. *APMIS Suppl* [Internet].  
959 2013; 1–51.
- 960 **62.** Hauser AR, Jain M, Bar-Meir M, McColley SA. Clinical significance of microbial infection and  
961 adaptation in cystic fibrosis. *Clin Microbiol Rev*. 2011;24: 29–70.
- 962 **63.** Schleheck D, Barraud N, Klebensberger J, Webb JS, McDougald D, Rice SA, et al.  
963 *Pseudomonas aeruginosa* PAO1 preferentially grows as aggregates in liquid batch cultures  
964 and disperses upon starvation. *PLoS One*. 2009;4: e5513.
- 965 **64.** Alhede M, Kragh KN, Qvortrup K, Allesen-Holm M, van Gennip M, Christensen LD, et al.  
966 Phenotypes of non-attached *Pseudomonas aeruginosa* aggregates resemble surface  
967 attached biofilm. *PLoS One*. 2011;6: e27943.
- 968 **65.** Kirketerp-Moller K, Jensen PO, Fazli M, Madsen KG, Pedersen J, Moser C, et al.  
969 Distribution, organization, and ecology of bacteria in chronic wounds. *J Clin Microbiol*.  
970 2008;46: 2717–2722.
- 971 **66.** Schaber JA, Triffo WJ, Suh SJ, Oliver JW, Hastert MC, Griswold JA, et al. *Pseudomonas*  
972 *aeruginosa* forms biofilms in acute infection independent of cell-to-cell signaling. *Infect*  
973 *Immun*. 2007;75: 3715–3721.
- 974 **67.** Worlitzsch D, Tarran R, Ulrich M, Schwab U, Cekici A, Meyer KC, et al. Effects of reduced  
975 mucus oxygen concentration in airway *Pseudomonas* infections of cystic fibrosis patients. *J*  
976 *Clin Invest*. 2002;109: 317–325.
- 977 **68.** Kragh KN, Hutchison JB, Melaugh G, Rodesney C, Roberts AE, Irie Y, et al. Role of  
978 Multicellular Aggregates in Biofilm Formation. *MBio*. 2016;7: e00237.
- 979 **69.** Melaugh G, Hutchison J, Kragh KN, Irie Y, Roberts A, Bjarnsholt T, et al. Shaping the Growth  
980 Behaviour of Biofilms Initiated from Bacterial Aggregates. *PLoS One*. 2015;11: e0149683.
- 981 **70.** Klebensberger J, Birkenmaier A, Geffers R, Kjelleberg S, Philipp B. SiaA and SiaD are  
982 essential for inducing autoaggregation as a specific response to detergent stress in  
983 *Pseudomonas aeruginosa*. *Environ Microbiol*. 2009;11: 3073–3086.
- 984 **71.** Klebensberger J, Lautenschlager K, Bressler D, Wingender J, Philipp B. Detergent-induced  
985 cell aggregation in subpopulations of *Pseudomonas aeruginosa* as a preadaptive survival  
986 strategy. *Environ Microbiol*. 2007;9: 2247–2259.

- 987 **72.** Colley B, Dederer V, Carnell M, Kjelleberg S, Rice SA, Klebensberger J. SiaA/D  
988 Interconnects c-di-GMP and RsmA Signaling to Coordinate Cellular Aggregation of  
989 *Pseudomonas aeruginosa* in Response to Environmental Conditions. *Front Microbiol.*  
990 2016;7: 179.
- 991 **73.** Chen G, Gan J, Yang C, Zuo Y, Peng J, Li M, et al. The SiaA/B/C/D signaling network  
992 regulates biofilm formation in *Pseudomonas aeruginosa*. *EMBO J.* 2020;39: e103412.
- 993 **74.** Ravichandran A, Sugiyama N, Tomita M, Swarup S, Ishihama Y. Ser/Thr/Tyr  
994 phosphoproteome analysis of pathogenic and non-pathogenic *Pseudomonas* species.  
995 *Proteomics.* 2009;9: 2764–2775.
- 996 **75.** Fukuda H, Shima H, Vesonder RF, Tokuda H, Nishino H, Katoh S, et al. Inhibition of Protein  
997 Serine/Threonine Phosphatases by Fumonisin B1, a Mycotoxin. *Biochem Biophys Res*  
998 *Commun.* 1996;220: 160–165.
- 999 **76.** Das AK, Helps NR, Cohen PT, Barford D. Crystal structure of the protein serine/threonine  
1000 phosphatase 2C at 2.0 Å resolution. *EMBO J.* 1996;15: 6798–6809.
- 1001 **77.** Levdikov VM, Blagova E V., McFeat A, Fogg MJ, Wilson KS, Wilkinson AJ. Structure of  
1002 components of an intercellular channel complex in sporulating *Bacillus subtilis*. *Proc Natl*  
1003 *Acad Sci.* 2012;109: 5441–5445.
- 1004 **78.** Bradshaw N, Levdikov VM, Zimanyi CM, Gaudet R, Wilkinson AJ, Losick R. A widespread  
1005 family of serine/threonine protein phosphatases shares a common regulatory switch with  
1006 proteasomal proteases. *Elife.* 2017;6: e26111.
- 1007 **79.** Tanoue K, Miller Jenkins LM, Durell SR, Debnath S, Sakai H, Tagad HD, et al. Binding of a  
1008 third metal ion by the human phosphatases PP2C $\alpha$  and Wip1 is required for phosphatase  
1009 activity. *Biochemistry.* 2013;52: 5830–5843.
- 1010 **80.** Debnath S, Kosek D, Tagad HD, Durell SR, Appella DH, Acevedo R, et al. A trapped human  
1011 PPM1A–phosphopeptide complex reveals structural features critical for regulation of PPM  
1012 protein phosphatase activity. *J Biol Chem.* 2018;293: 7993–8008.
- 1013 **81.** Jagmann N, Henke SF, Philipp B. Cells of *Escherichia coli* are protected against severe  
1014 chemical stress by co-habiting cell aggregates formed by *Pseudomonas aeruginosa*. *Appl*  
1015 *Microbiol Biotechnol.* 2015;99: 8285–8294.
- 1016 **82.** Baker EH, Wood DM, Brennan AL, Clark N, Baines DL, Philips BJ. Hyperglycaemia and  
1017 pulmonary infection. *Proc Nutr Soc.* 2006;65: 227–235.
- 1018 **83.** Flynn JM, Niccum D, Dunitz JM, Hunter RC. Evidence and Role for Bacterial Mucin  
1019 Degradation in Cystic Fibrosis Airway Disease. *PLoS Pathog.* 2016;12: e1005846.
- 1020 **84.** LaBauve AE, Wargo MJ. Detection of Host-Derived Sphingosine by *Pseudomonas*  
1021 *aeruginosa* Is Important for Survival in the Murine Lung. *PLoS Pathog.* 2014;10: e1003889.
- 1022 **85.** Barker M, Hengst M, Schmid J, Buers HJ, Mittermaier B, Klemp D, et al. Volatile organic  
1023 compounds in the exhaled breath of young patients with cystic fibrosis. *Eur Respir J.*  
1024 2006;27: 929–936.
- 1025 **86.** Liu Q, Liu Y, Kang Z, Xiao D, Gao C, Xu P, et al. 2,3-Butanediol catabolism in *Pseudomonas*  
1026 *aeruginosa* PAO1. *Environ Microbiol.* 2018;20: 3927–3940.
- 1027 **87.** Whiteson KL, Meinardi S, Lim YW, Schmieder R, Maughan H, Quinn R, et al. Breath gas  
1028 metabolites and bacterial metagenomes from cystic fibrosis airways indicate active pH  
1029 neutral 2,3-butanediol fermentation. *ISME J.* 2014;8: 1247–1258.

- 1030 **88.** Nguyen M, Sharma A, Wu W, Gomi R, Sung B, Hospodsky D, et al. The fermentation  
1031 product 2,3-butanediol alters *P. aeruginosa* clearance, cytokine response and the lung  
1032 microbiome. *ISME J.* 2016;10: 2978–2983.
- 1033 **89.** Venkataraman A, Rosenbaum MA, Werner JJ, Winans SC, Angenent LT. Metabolite  
1034 transfer with the fermentation product 2,3-butanediol enhances virulence by *Pseudomonas*  
1035 *aeruginosa*. *ISME J.* 2014;8: 1210–1220.
- 1036 **90.** Jones CJ, Newsom D, Kelly B, Irie Y, Jennings LK, Xu B, et al. ChIP-Seq and RNA-Seq  
1037 reveal an AmrZ-mediated mechanism for cyclic di-GMP synthesis and biofilm development  
1038 by *Pseudomonas aeruginosa*. *PLoS Pathog.* 2014;10: e1003984.
- 1039 **91.** Baraquet C, Harwood CS. FleQ DNA Binding Consensus Sequence Revealed by Studies  
1040 of FleQ-Dependent Regulation of Biofilm Gene Expression in *Pseudomonas aeruginosa*. *J*  
1041 *Bacteriol.* 2015;198: 178–186.
- 1042 **92.** Romero M, Silistre H, Lovelock L, Wright VJ, Chan KG, Hong KW, et al. Genome-wide  
1043 mapping of the RNA targets of the *Pseudomonas aeruginosa* riboregulatory protein RsmN.  
1044 *Nucleic Acids Res.* 2018;46: 6823–6840.
- 1045 **93.** Corona F, Reales-Calderón JA, Gil C, Martínez JL. The development of a new parameter  
1046 for tracking post-transcriptional regulation allows the detailed map of the *Pseudomonas*  
1047 *aeruginosa* Crc regulon. *Sci Rep.* 2018;8: 16793.
- 1048 **94.** Brencic A, Lory S. Determination of the regulon and identification of novel mRNA targets of  
1049 *Pseudomonas aeruginosa* RsmA. *Mol Microbiol.* 2009;72: 612–632.
- 1050 **95.** Chew SC, Yam JKH, Matysik A, Seng ZJ, Klebensberger J, Givskov M, et al. Matrix  
1051 Polysaccharides and SiaD Diguanylate Cyclase Alter Community Structure and  
1052 Competitiveness of *Pseudomonas aeruginosa* during Dual-Species Biofilm Development  
1053 with *Staphylococcus aureus*. *MBio.* 2018;9: e00585-18.
- 1054 **96.** Laventie BJ, Sangermani M, Estermann F, Manfredi P, Planes R, Hug I, et al. A Surface-  
1055 Induced Asymmetric Program Promotes Tissue Colonization by *Pseudomonas aeruginosa*.  
1056 *Cell Host Microbe.* 2019;25: 140-152.e6.
- 1057 **97.** Valentini M, Laventie BJ, Moscoso J, Jenal U, Filloux A. The Diguanylate Cyclase HsbD  
1058 Intersects with the HptB Regulatory Cascade to Control *Pseudomonas aeruginosa* Biofilm  
1059 and Motility. *PLoS Genet.* 2016;12: e1006354.
- 1060 **98.** Baena I, Pérez-Mendoza D, Sauviac L, Francesch K, Martín M, Rivilla R, et al. A partner-  
1061 switching system controls activation of mixed-linkage  $\beta$ -glucan synthesis by c-di-GMP in  
1062 *Sinorhizobium meliloti*. *Environ Microbiol.* 2019;21: 3379-3391.
- 1063 **99.** D’Argenio DA, Calfee MW, Rainey PB, Pesci EC. Autolysis and autoaggregation in  
1064 *Pseudomonas aeruginosa* colony morphology mutants. *J Bacteriol.* 2002;184: 6481–6489.
- 1065 **100.** Poh W-H, Lin J, Colley B, Müller N, Goh BC, Schleheck D, et al. SiaABCD – A threonine  
1066 phosphorylation pathway that controls biofilm formation in *Pseudomonas aeruginosa*  
1067 bioRxiv: 674879v1 [Preprint]. 2019 [cited 06.04.2020]. Available from  
1068 <https://www.biorxiv.org/content/10.1101/674879v1>
- 1069 **101.** Merrill AH, Sullards MC, Wang E, Voss KA, Riley RT. Sphingolipid metabolism: Roles in  
1070 signal transduction and disruption by fumonisins. *Environ Health Perspect.* 2001;109: 283–  
1071 289.
- 1072 **102.** Jacobs MA, Alwood A, Thaipisuttikul I, Spencer D, Haugen E, Ernst S, et al. Comprehensive  
1073 transposon mutant library of *Pseudomonas aeruginosa*. *Proc Natl Acad Sci U S A.*  
1074 2003;100: 14339–14344.
- 1075 **103.** Savitsky P, Bray J, Cooper CD, Marsden BD, Mahajan P, Burgess-Brown NA, et al. High-

- 1076 throughput production of human proteins for crystallization: the SGC experience. *J Struct*  
1077 *Biol.* 2010;172: 3–13.
- 1078 **104.** Laemmli UK. Cleavage of structural proteins during the assembly of the head of  
1079 bacteriophage T4. *Nature.* 1970;227: 680–685.
- 1080 **105.** Meyer TS, Lamberts BL. Use of coomassie brilliant blue R250 for the electrophoresis of  
1081 microgram quantities of parotid saliva proteins on acrylamide-gel strips. *Biochim Biophys*  
1082 *Acta - Gen Subj.* 1965;107: 144–145.
- 1083 **106.** Burrichter A, Denger K, Franchini P, Huhn T, Müller N, Spiteller D, et al. Anaerobic  
1084 degradation of the plant sugar sulfoquinovose concomitant with H<sub>2</sub>S production:  
1085 *Escherichia coli* k-12 and *Desulfovibrio* sp. Strain DF1 as co-culture model. *Front Microbiol.*  
1086 2018;9: 2792.
- 1087 **107.** Denger K, Weiss M, Felux A-K, Schneider A, Mayer C, Spiteller D, et al. Sulphoglycolysis in  
1088 *Escherichia coli* K-12 closes a gap in the biogeochemical sulphur cycle. *Nature.* 2014;507:  
1089 114–117.
- 1090 **108.** Schmidt A, Müller N, Schink B, Schleheck D. A Proteomic View at the Biochemistry of  
1091 Syntrophic Butyrate Oxidation in *Syntrophomonas wolfei*. *PLoS One.* 2013;8: e56905.
- 1092 **109.** Adams PD, Afonine P V., Bunkóczi G, Chen VB, Davis IW, Echols N, et al. PHENIX: A  
1093 comprehensive Python-based system for macromolecular structure solution. *Acta*  
1094 *Crystallogr Sect D Biol Crystallogr.* 2010;66: 213–221.
- 1095 **110.** Smart OS, Womack TO, Flensburg C, Keller P, Paciorek W, Sharff A, et al. Exploiting  
1096 structure similarity in refinement: Automated NCS and target-structure restraints in  
1097 BUSTER. *Acta Crystallogr Sect D Biol Crystallogr.* 2012;68: 368–380.
- 1098 **111.** Humphrey W, Dalke A, Schulten K. VMD: Visual molecular dynamics. *J Mol Graph.*  
1099 1996;14:33–38.
- 1100 **112.** Phillips JC, Braun R, Wang W, Gumbart J, Tajkhorshid E, Villa E, et al. Scalable molecular  
1101 dynamics with NAMD. *J. Comput. Chem.* 2005;26: 1781–1802.
- 1102 **113.** Pierce BG, Wiehe K, Hwang H, Kim B-H, Vreven T, Weng Z. ZDOCK server: interactive  
1103 docking prediction of protein–protein complexes and symmetric multimers. *Bioinformatics.*  
1104 2014;30: 1771–1773. Available from: <https://doi.org/10.1093/bioinformatics/btu097>
- 1105



1106 **Figures**

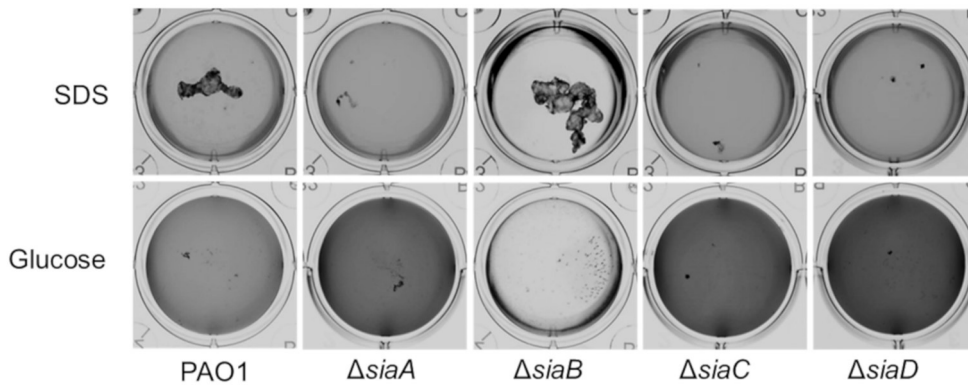

1107

1108 **Fig 1:** Growth of the *P. aeruginosa* strains on 3.5 mM SDS or 22 mM glucose in 12 well microtiter plates  
1109 after 18 h, at 30°C and 200 rpm. Images were acquired using a flat-bed scanner (Umax Powerlook),  
1110 normalized by the “match colour” function of Photoshop (Adobe Photoshop CS5), and converted to  
1111 greyscale.

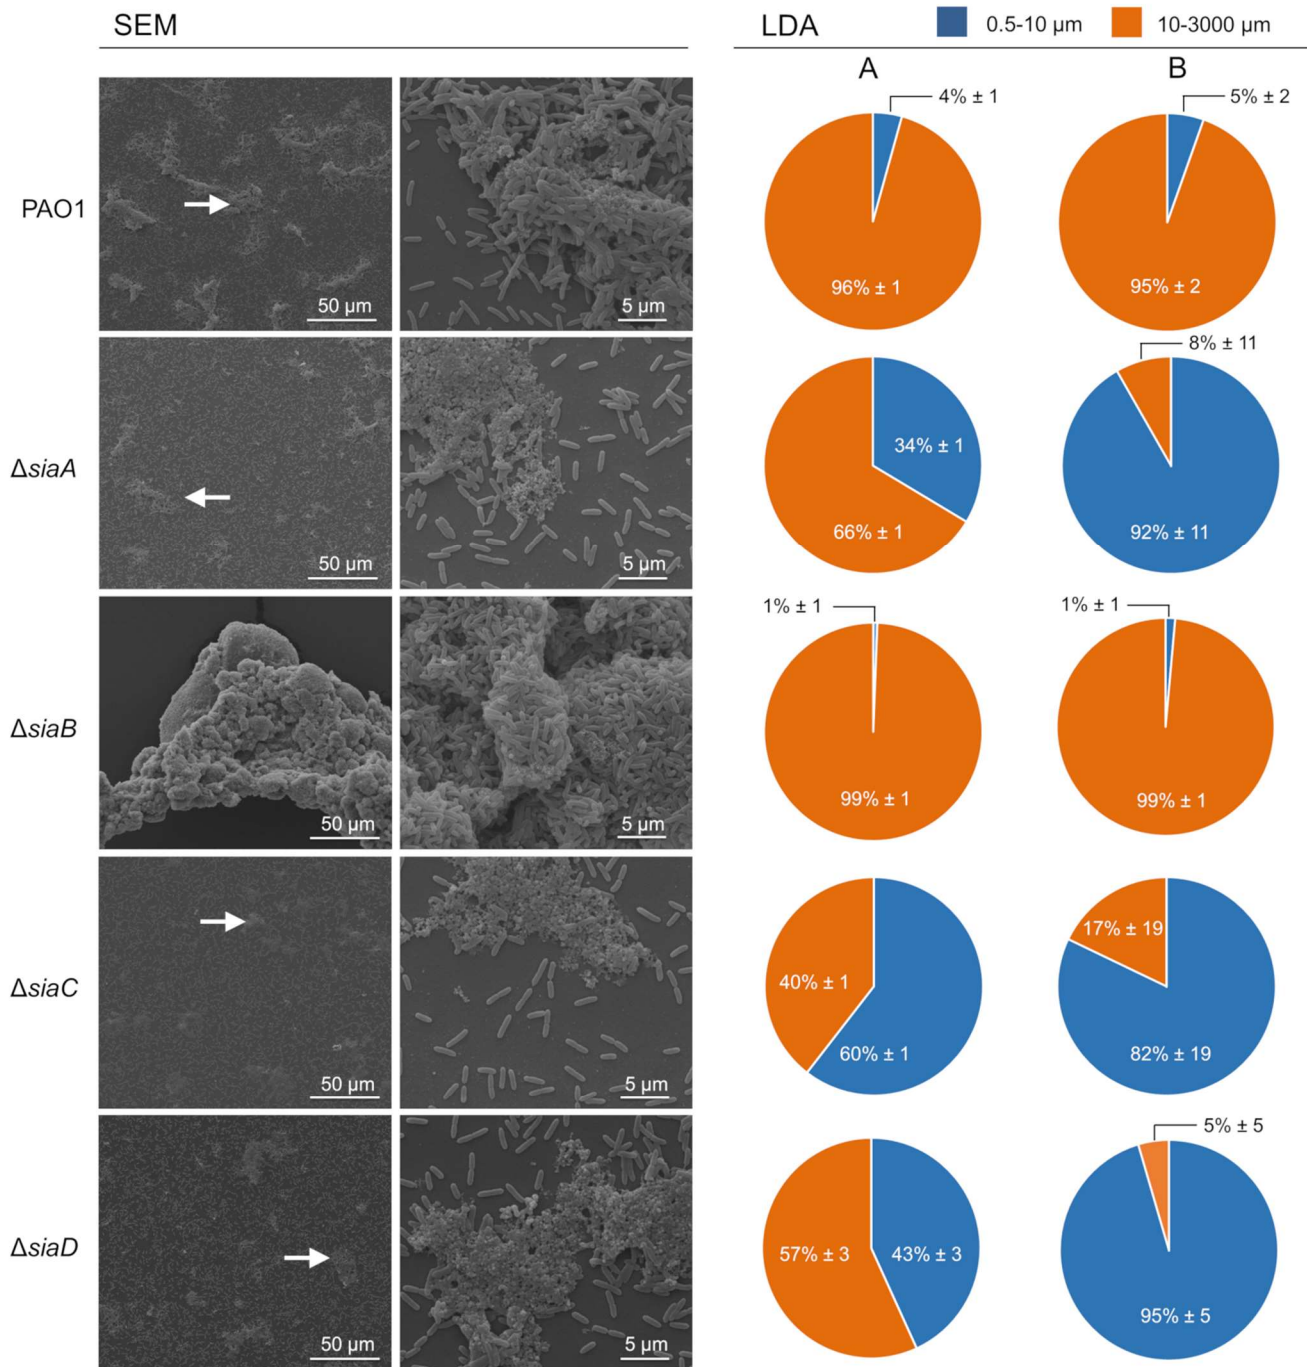

1112  
 1113 **Fig 2:** Scanning electron microscopy (SEM) and laser diffraction analysis (LDA) demonstrated the  
 1114 different aggregation phenotypes of *P. aeruginosa* wildtype and mutant strains during growth with glucose.  
 1115 Triplicate cultures of strains were grown with 22 mM glucose in 50 mL cultures shaking at 200 rpm at 30°C.  
 1116 After 5.5 h incubation, the replicate samples were pooled and used for SEM. The white arrows (left panel)  
 1117 highlight representative regions showing aggregated cells, which were then examined at higher  
 1118 magnification (right panel). Similar samples were also analyzed using a particle size analyzer (SALD 3101,  
 1119 Shimadzu; see Materials and Methods for details) in the range 0.5-3000 μm diameter. The data obtained  
 1120 from two independent biological replicates (A and B; n = 2) are presented as the percentages of the total  
 1121 bio-volume of particles distributed over two different size ranges (0.5-10 μm and 10-3000 μm) relative to  
 1122 the total bio-volume of all particles detected. The data represent the mean value of triplicate measurement  
 1123 of the same sample (n = 3) with the corresponding technical error.

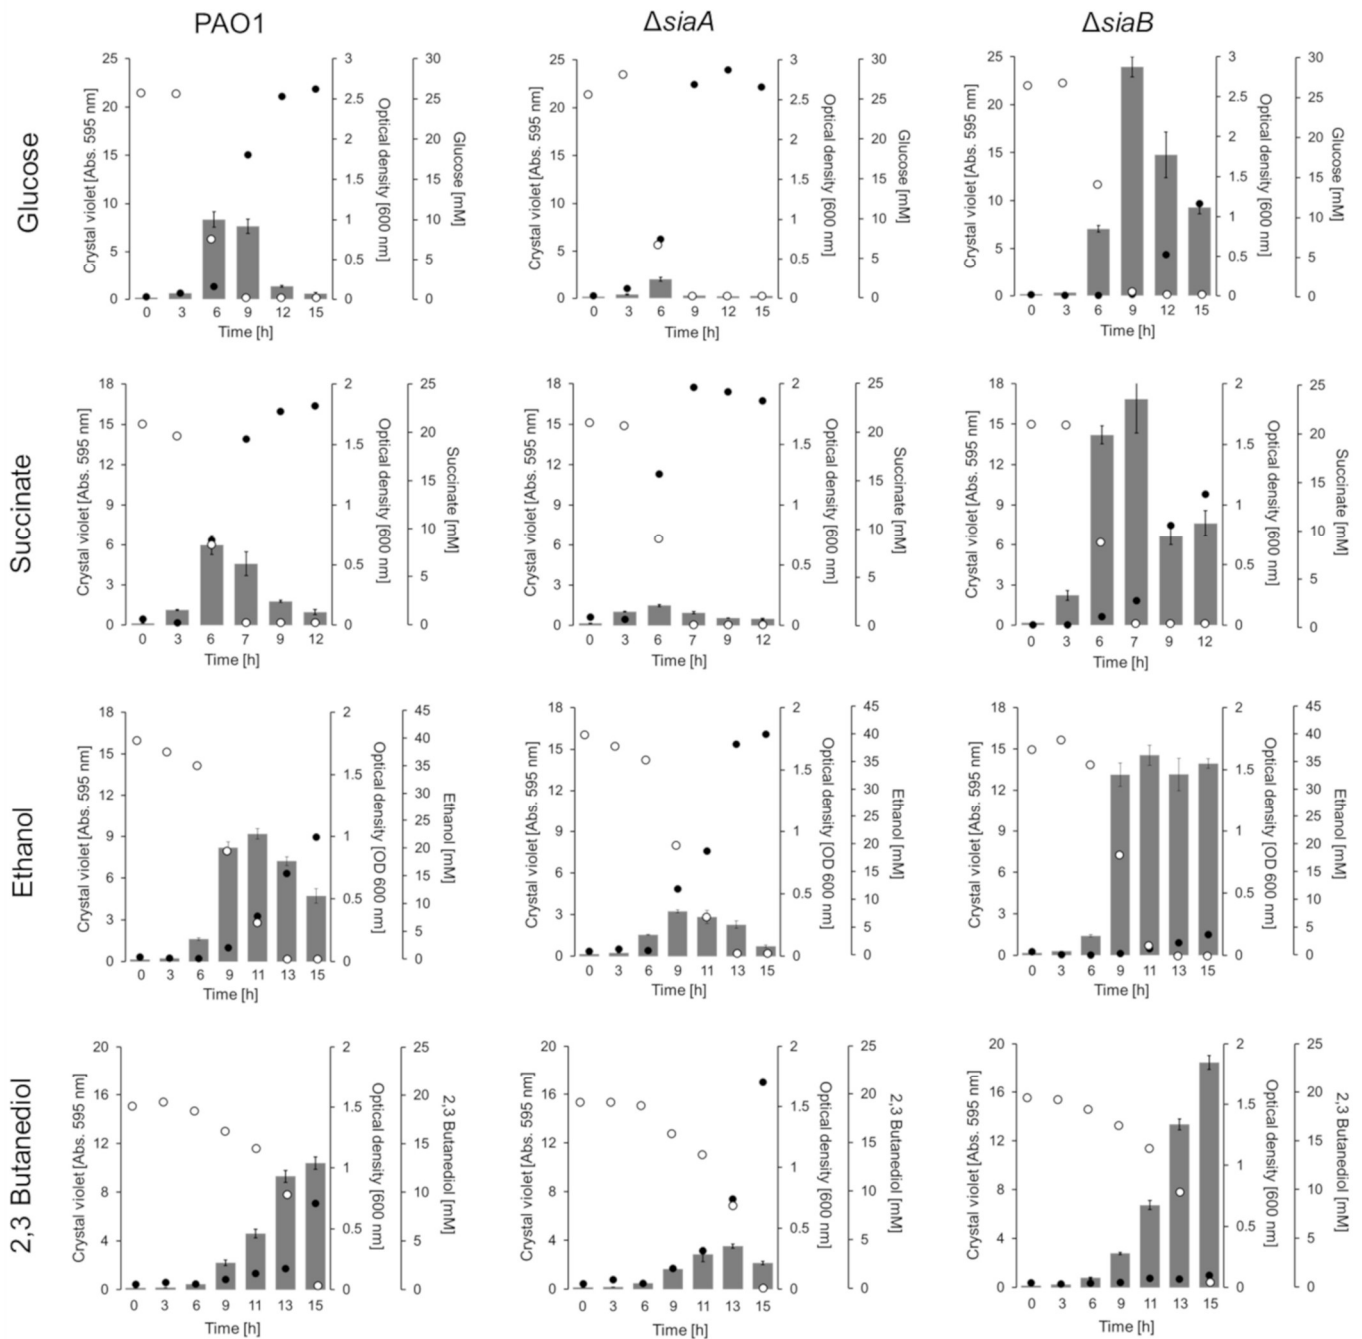

**Fig 3:** Quantification of biofilm formation and growth in suspension of strains PAO1,  $\Delta siaA$  and  $\Delta siaB$  with 22 mM glucose, 20 mM succinate, 40 mM ethanol or 20 mM 2,3-butanediol in 24 well microtiter plates (growth of the  $\Delta siaC$  and  $\Delta siaD$  mutants are shown in **Fig S1**). Individual 24 well microtiter plates were used to quantify attached biofilms by crystal violet (CV) staining (*grey bars*) as well as the growth in the supernatant as OD<sub>600</sub> (*black dots*); substrate concentrations are shown (*open circles*). For crystal violet (CV) staining, the data are shown as the mean value of four biological replicates (n = 4). To reduce complexity, the standard deviation of replicates is shown as error bars. OD<sub>600</sub> and substrate concentrations represent the mean value from the same quadruplicates but quantified from pooled (1:1:1:1 [v/v/v/v]) samples using a photometer, the GO assay kit and specific HPLC methods, respectively (see Materials and Methods for details). All cultures were incubated at 30°C and 200 rpm shaking.

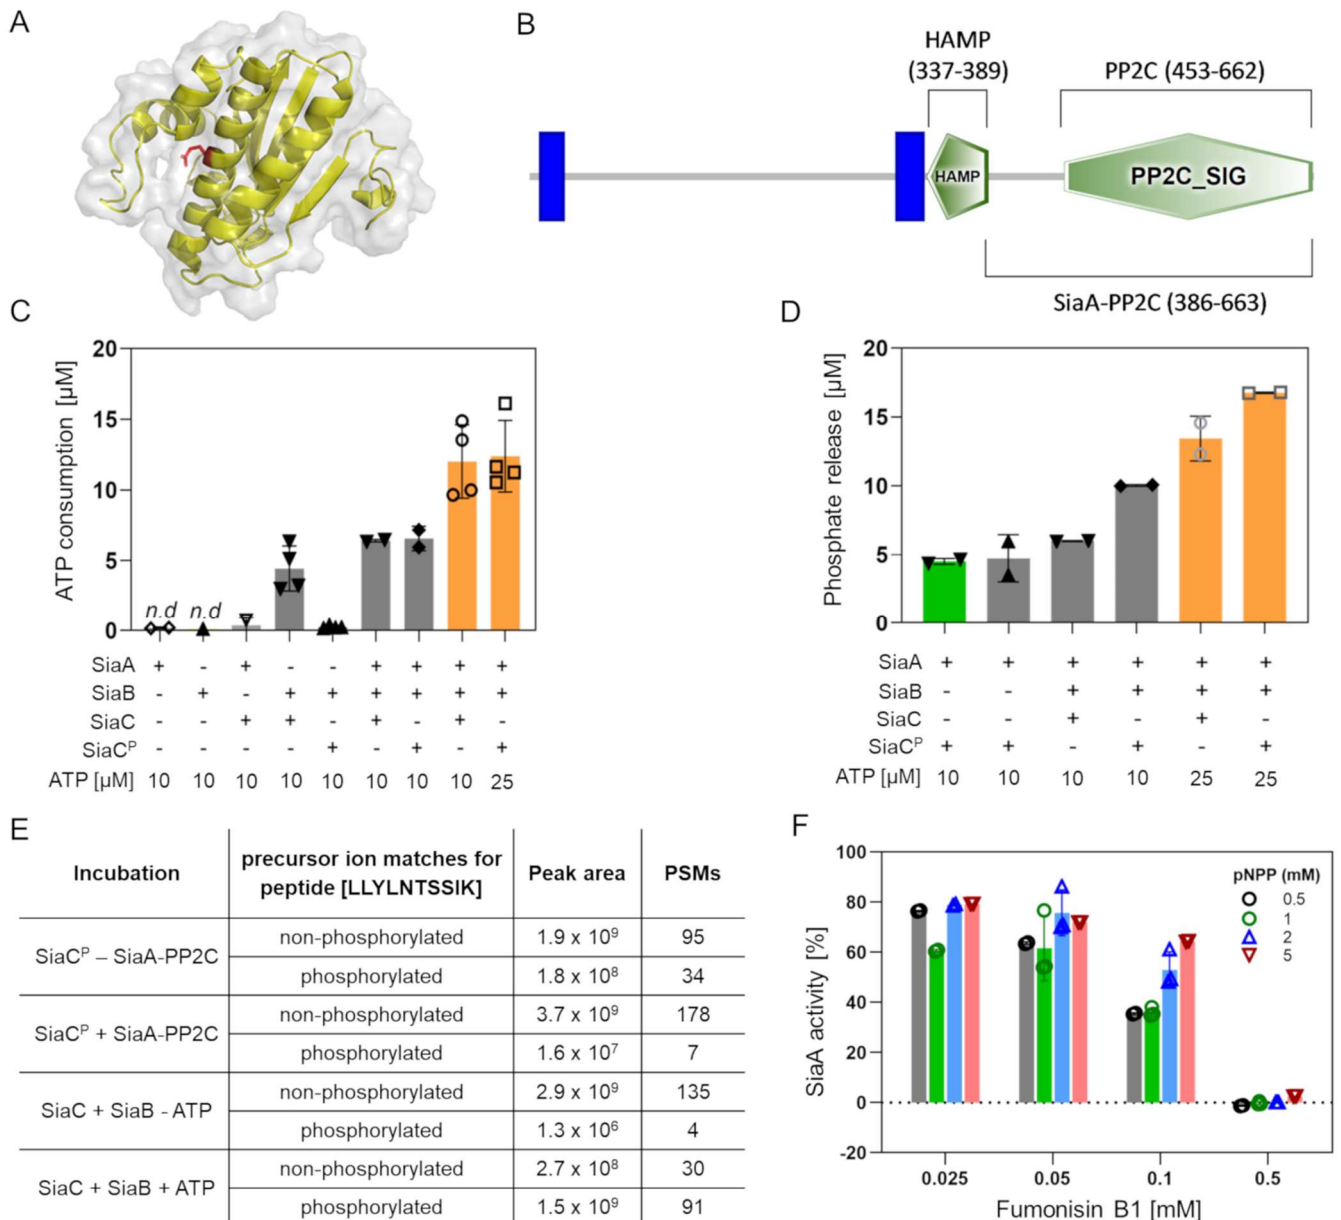

**Fig 4:** (A) Homology model of SiaB (PA0171) predicted using I-Tasser (<https://zhanglab.ccmb.med.umich.edu/I-TASSER/>) shown as cartoon with 80% transparent surface using the Pymol software (version 2.1.1). The predicted catalytic glutamic acid residue at position 61 is highlighted (*red sticks*). (B) Representation of SiaA using the SMART online tool (<http://smart.embl-heidelberg.de/>). The predicted PP2C\_SIG domain, the HAMP domain and the two membrane-spanning regions (*blue bars*) are represented. (C) ATP consumption of SiaB measured by the ADP-Glo™ assay kit. Assays were performed for 1 h at 37°C in 20 mM Tris-HCL [pH 7.5], 150 mM NaCl in the absence or the presence of 10 mM ATP. (D) Phosphate quantification using a malachite green assay after incubation. Reactions were performed for 1 h at 37°C with 0.5 μM SiaA or SiaB and 5 μM of SiaC or SiaC<sup>P</sup> in 20 mM Tris-HCL [pH 7.5], 150 mM NaCl buffer containing 20 mM MgCl<sub>2</sub> or MnCl<sub>2</sub> (*green bar*), and 10 or 25 μM ATP (*orange bars*). (E) Summary of shotgun peptide-mass spectrometry (PMS) results from analysis of SiaC purified from *E. coli* and the Δ*siaA* mutant after incubation with SiaB and SiaA-PP2C, respectively. Incubations were performed for 2 h at 30°C prior to separation by SDS-PAGE for PMS (see Material and

1149 Methods) **(F)** Phosphatase activity of SiaA-PP2C in the presence of 0.5-5 mM of pNPP and 0-0.5 mM of  
1150 fumonisin B1. Assays were performed in 150 mM NaCl, 20 mM Tris-HCl pH 7.5 at 37°C and measured as  
1151 an increase in absorbance [405 nm]. The initial rate of reaction was calculated and expressed as a  
1152 percentage compared to the untreated control. Data in **C**, **D** and **F** are presented as the average from at  
1153 least two independent enzymatic assays (*bars*; n = 2-4) with the corresponding standard deviation of the  
1154 mean (*error bars*) and the individual data points (*circles*). Results below the detection limit are indicated  
1155 (*n.d.*).

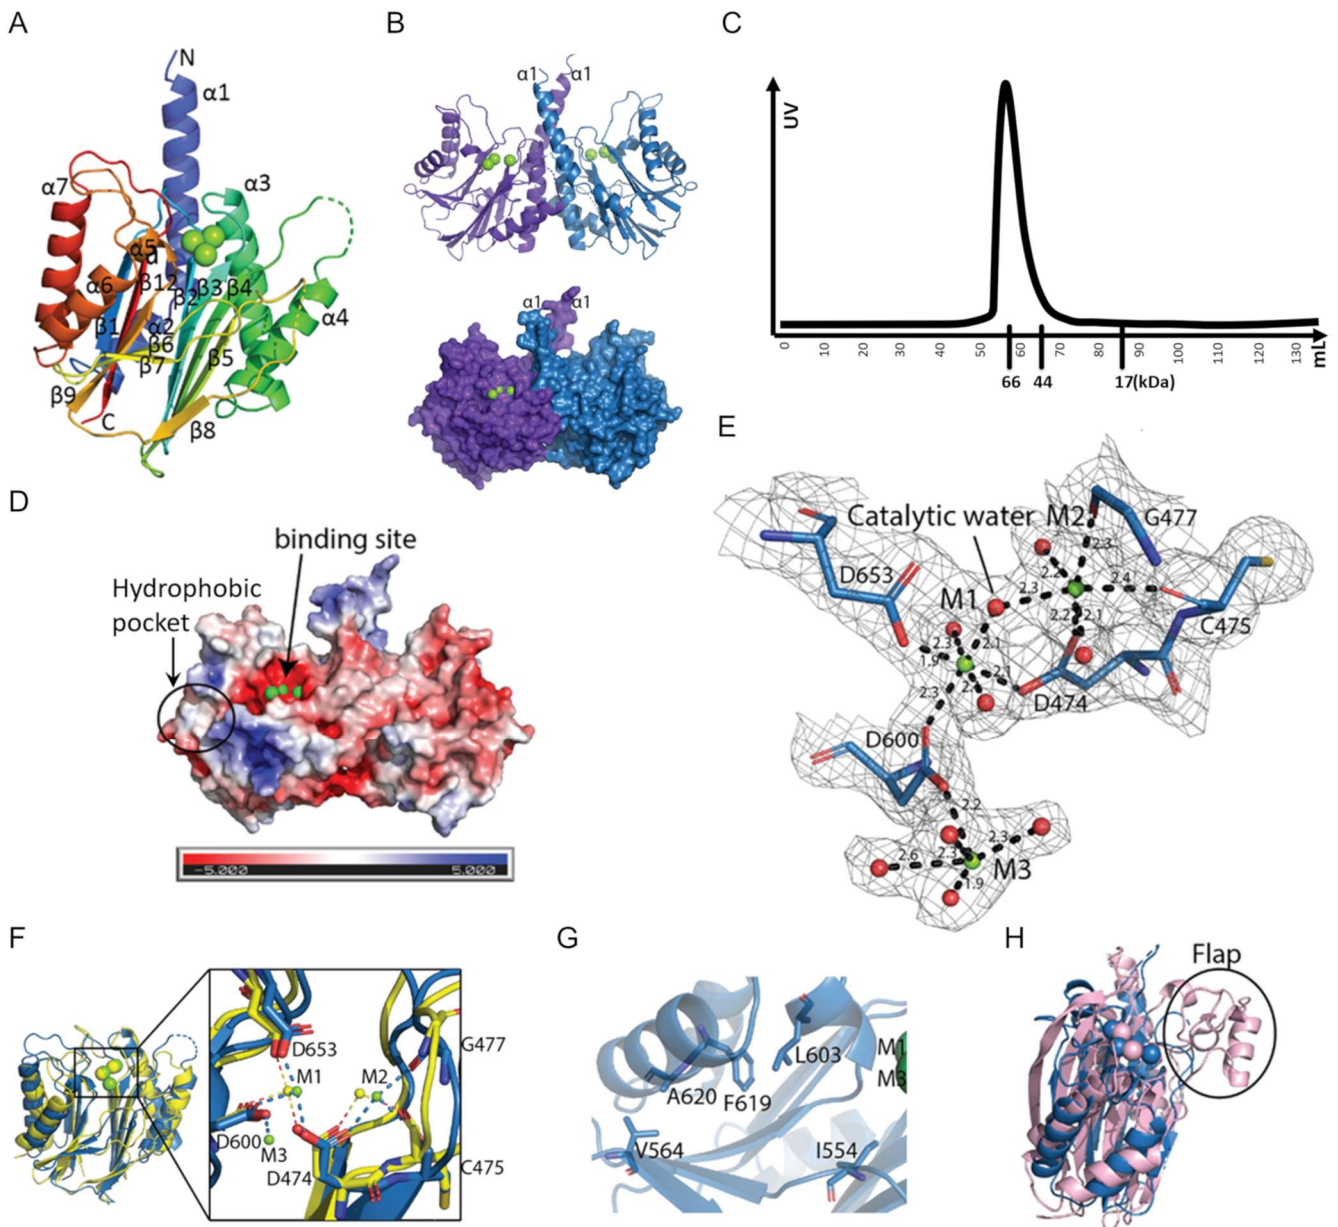

1156  
 1157 **Fig 5:** The SiaA-PP2C structure (PDB ID: 6K4E). **(A)** “Rainbow” representation of the SiaA-PP2C  
 1158 monomer. The N-terminus of SiaA-PP2C is coloured in blue and the C-terminus in red, with secondary  
 1159 structures labelled. The three  $Mg^{2+}$  ions identified at the active site are represented as green spheres. **(B)**  
 1160 The SiaA-PP2C dimer displayed in cartoon (top) or surface (bottom). Monomer A is in purple and B in  
 1161 blue. **(C)** Size-exclusion chromatography of SiaA-PP2C. Elution volumes of markers are labelled below X-  
 1162 axis. **(D)** APBS surface electrostatic potential of SiaA-PP2C homodimer in the same orientation as in panel  
 1163 B. **(E)** Close-up view of the active site of the PP2C-like phosphatase domain of SiaA-PP2C with conserved  
 1164 acidic residues in the active site shown as sticks and labelled. An electron density map with Fourier  
 1165 coefficients  $2F_o - F_c$  is overlaid at a level of  $1\sigma$  above the mean. The  $Mg^{2+}$  ions are shown as green spheres  
 1166 and the oxygen atoms of the coordinating water molecules are displayed as red spheres. M1 and M2 are  
 1167 both coordinated by oxygen atoms from three residues and three water molecules in an octahedral  
 1168 manner. Distances between the metal ions and the coordinating atoms are indicated. **(F)** Overlay of  
 1169 SiaA\_PP2C monomer B (blue) and the phosphatase domain of Rv1364C (yellow).  $Mg^{2+}$  ions M1 and M2

1170 of SiaA-PP2C shown as green spheres overlap with  $Mn^{2+}$  ions of Rv1643C (*yellow spheres*). The  $\alpha 1$  and  
1171  $\alpha 2$  helices of SiaA-PP2C are not displayed for clarity. **(inset)** Magnified view of the active site. Metal  
1172 coordinating residues of SiaA-PP2C are labelled. **(G)** Residues of the hydrophobic pocket shown as sticks.  
1173 **(H)** Superposition of SiaA monomer B (*blue*) and human PPM1A (*light pink*; PDB code 6B67-A). The Flap  
1174 sub-domain of human PPM1A (absent in SiaA-PP2C) is circled.

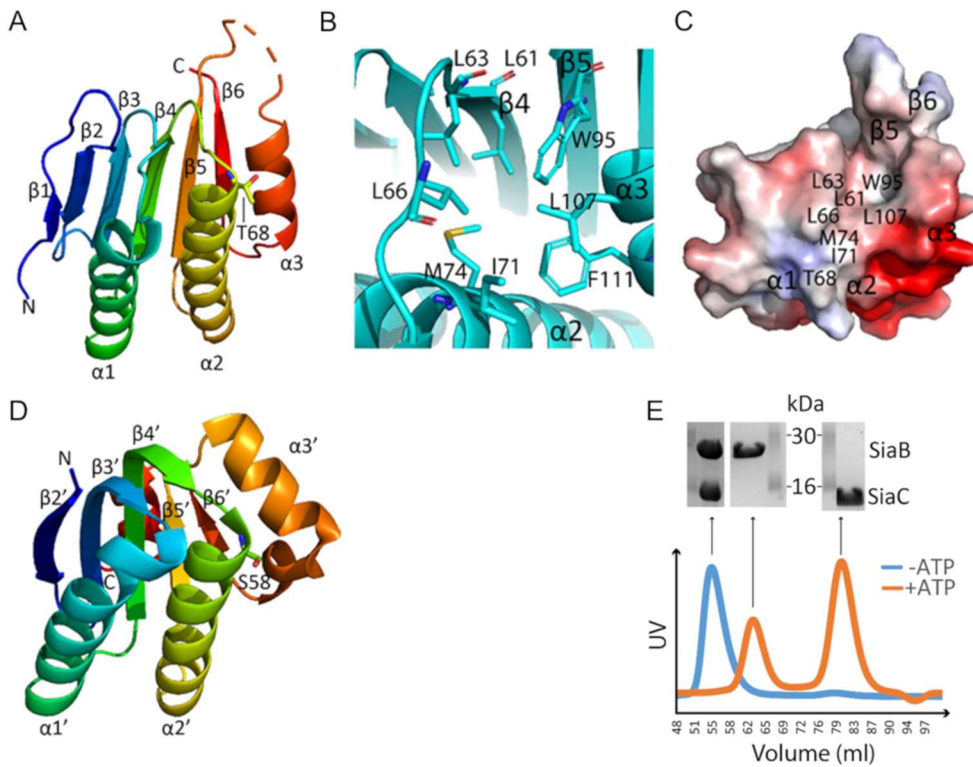

1175

1176

1177

1178

1179

1180

1181

1182

**Fig 6:** (A) “Rainbow” representation of SiaC (PDB ID: 6K4F). The phosphorylation site T68 is shown as sticks. (B) Hydrophobic pocket of SiaC next to T68. (C) Surface electrostatic potential of SiaC with the hydrophobic pocket labelled. The structure is displayed in the same orientation as in panel B. (D) “Rainbow” representation of 4QTP. The phosphorylation site S58 is shown as sticks. (E) Size-exclusion chromatography profiles derived by UV-Absorption for SiaB/SiaC mixtures (1:1 molar ratio) in the presence (orange line) or absence (blue line) of 10 mM ATP and 20 mM MgCl<sub>2</sub>. The SDS-PAGE analysis of the proteins causing the peaks in the size exclusion chromatography are shown above the profiles.



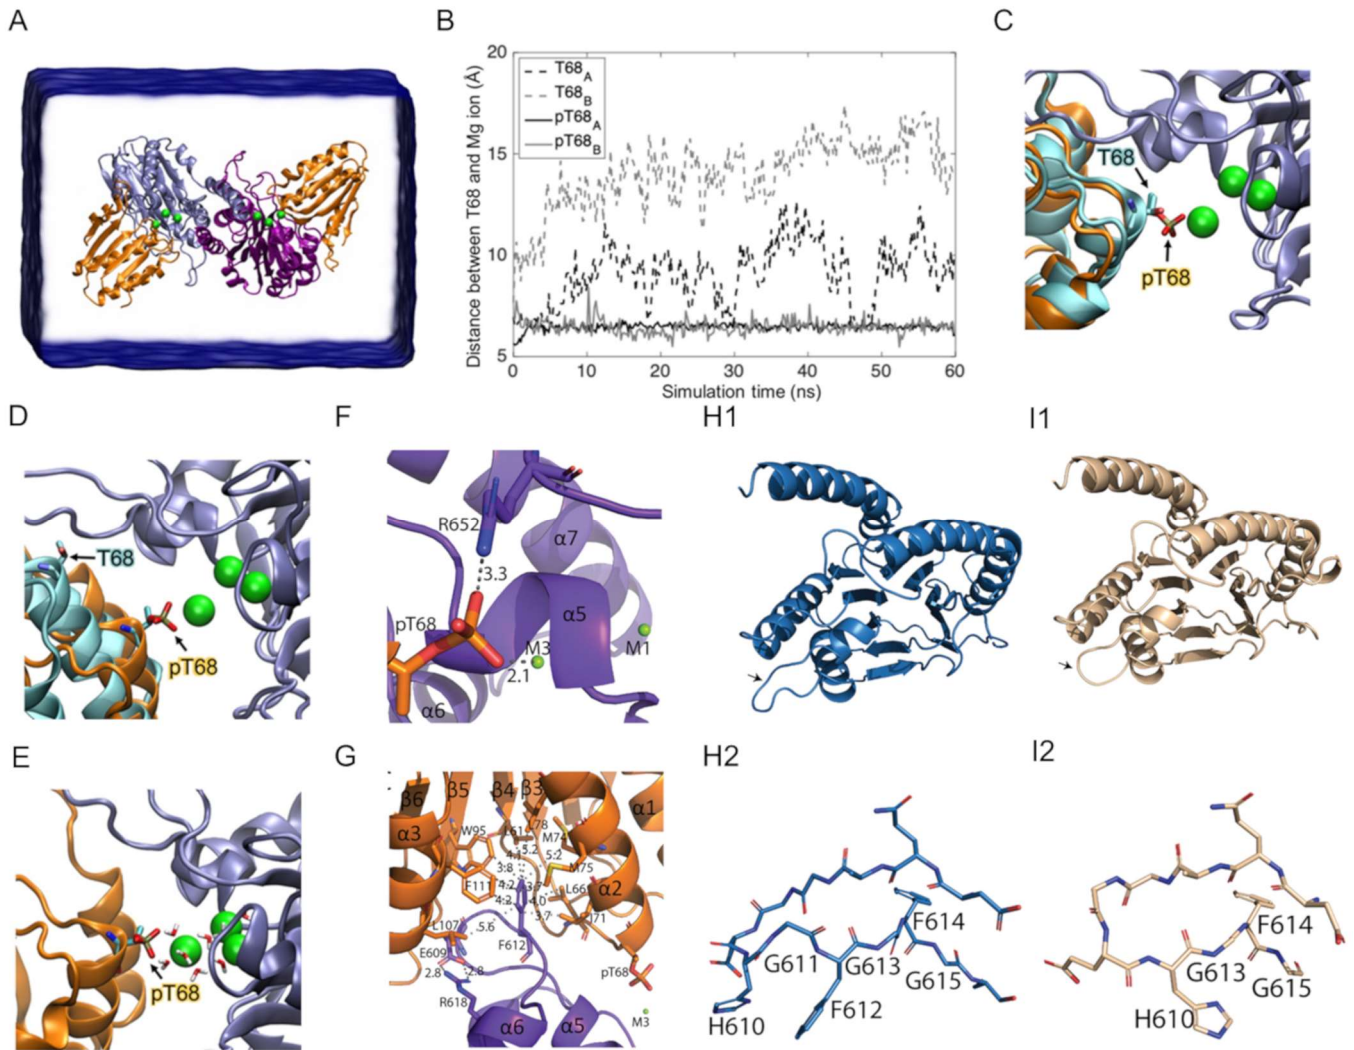

1183

1184 **Fig 7:** Binding of SiaA-PP2C to phosphorylated SiaC. **(A)** The simulated system using ZDOCK contains  
 1185 a SiaA-PP2C dimer (*blue/purple ribbon*) with SiaC (*cyan ribbon*) or SiaC<sup>p</sup> (*orange ribbon*) docked to each  
 1186 SiaA-PP2C monomer. **(B)** Distance between C $\alpha$  of T68/pT68 and Mg<sup>2+</sup> ion (M3). Phosphorylated T68 of  
 1187 both SiaC<sup>p</sup> (*black and grey solid lines*) remains coordinated with the Mg<sup>2+</sup> ion (*green sphere*).  
 1188 Unphosphorylated T68 (*black and grey dashed lines*) dissociates from the Mg<sup>2+</sup> ion in < 15 ns. The  
 1189 positions of T68 and Mg<sup>2+</sup> ions before **(C)** and after the simulation **(D)** are displayed in the same color code  
 1190 as in panel A. **(E)** The pT68 of SiaC<sup>p</sup> is interacting with the bridging water molecules for the entire 60 ns  
 1191 of simulation. **(F-G)** Cartoon representations of specific parts of the SiaA-PP2C/SiaC<sup>p</sup> complex after 60 ns  
 1192 of simulation (**Supplementary zip-file**). SiaC<sup>p</sup> is coloured in orange; SiaA-PP2C dimer is coloured in  
 1193 purple and blue **(F)** Interaction of pT68 with R652 and M3. R652 might be important for stabilisation of the  
 1194 complex through the formation of a salt bridge. pT68 remains in close proximity with M3 (2.1 Å). **(G)** F612  
 1195 interacts with the hydrophobic pocket of SiaC<sup>p</sup>. Salt bridge formation between R618 and E609 in SiaA-  
 1196 PP2C might restrain the orientation of the flexible loop between  $\alpha$ 5 and  $\alpha$ 6 to accommodate its interaction  
 1197 with the hydrophobic pocket of SiaC<sup>p</sup>. Cartoon representation of SiaA-PP2C **(H1)** and a homology model  
 1198 of the mutant allele SiaA-PP2C\* **(I1)** from the  $\Delta$ siaA mutant (**Supplementary zip-file**), in which G611 and  
 1199 F612 at the flexible loop between  $\alpha$ 5 and  $\alpha$ 6 are deleted (*black arrows*). Stick representation of the flexible  
 1200 loop of SiaA-PP2C **(H2)** and SiaA-PP2C\* **(I2)**.

1201

## Supporting Information

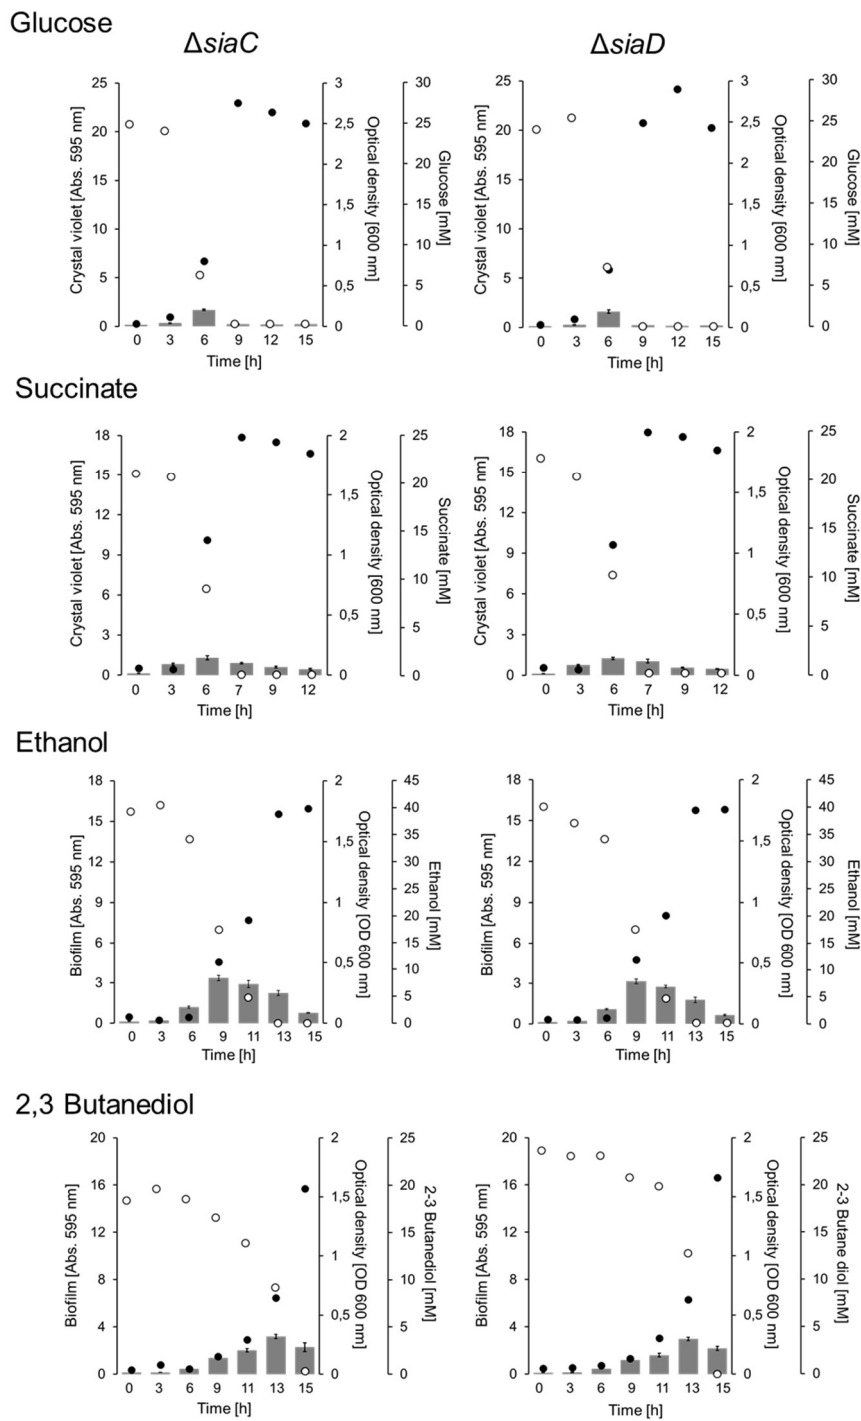

1202

1203

1204

1205

1206

1207

1208

1209

1210

**Fig S1:** Growth of wild type and the  $\Delta siaC$  and  $\Delta siaD$  strains in M9 medium with 22 mM glucose, 20 mM succinate, 40 mM ethanol or 20 mM 2,3 butanediol at 30°C and 200 rpm shaking. Individual cell-culture treated, 24 well microtiter plates were used to quantify attached biofilms (grey bars), OD<sub>600</sub> of supernatants (black dots), and substrate concentrations (open circles) at various time points. Attached biofilms were quantified by a modified crystal violet (CV) staining and error bars represent the standard deviation of four biological replicates (n = 4). OD<sub>600</sub> of supernatants and substrate concentrations represent the mean value from the same quadruplicates but quantified from pooled (1:1:1:1 [v/v/v/v]) samples using a photometer, the GO assay kit, and specific HPLC methods (see Material and Method for details).

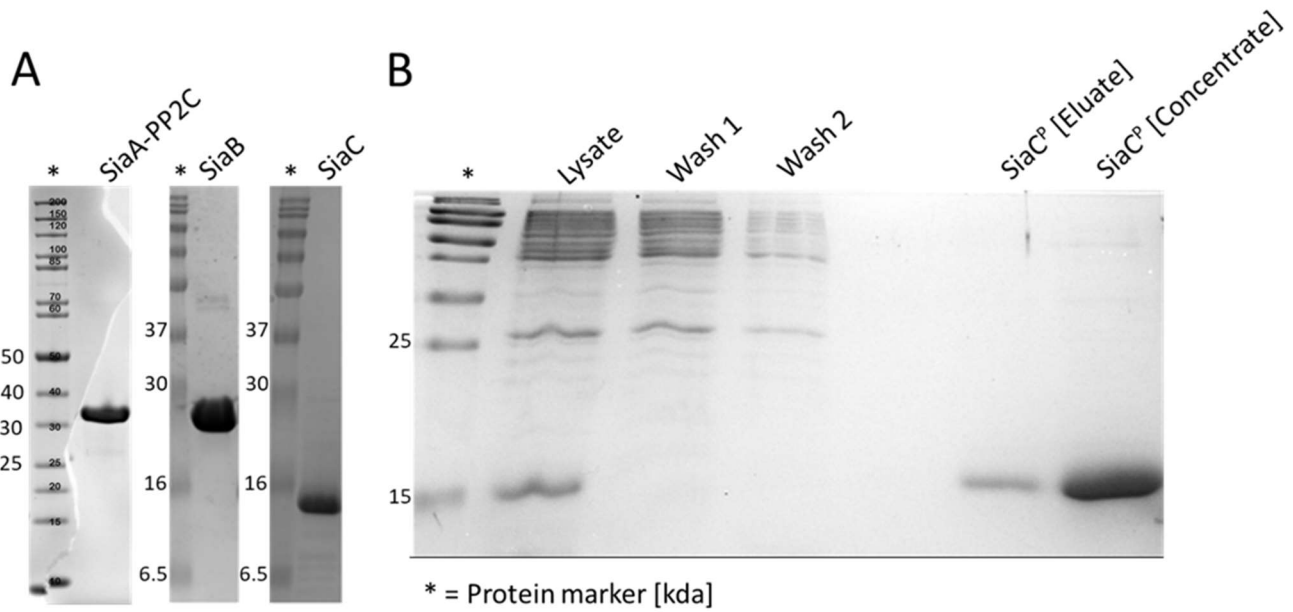

1211

1212

1213

1214

1215

1216

1217

**Fig S2:** SDS-PAGE analysis of the purified SiaA-PP2C, SiaB, SiaC and SiaAPP2C\* protein samples after purification. A) The purified SiaA phosphatase domain (amino acids 386-663 of the SiaA protein sequence; Genbank ID: NP\_248862), the SiaB (Genbank-ID: 248862) and SiaC (Genbank-ID: NP\_248860) proteins produced in *E. coli* after affinity chromatography and subsequent gel filtration. B) The purified SiaC protein (Genbank-ID: NP\_248860) produced in the  $\Delta siaA$  mutant (SiaC<sup>P</sup>) after affinity chromatography (eluate) and subsequent protein concentration.

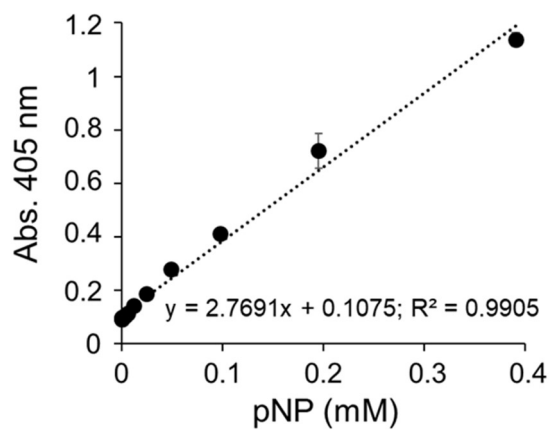

1218

1219

1220

**Fig S3:** Standard calibration curve of p-nitrophenolate (pNP) concentrations against absorbance (Abs. 405 nm) in phosphatase assay buffer (150 mM NaCl, 100 mM Tris-HCl pH 7.5).

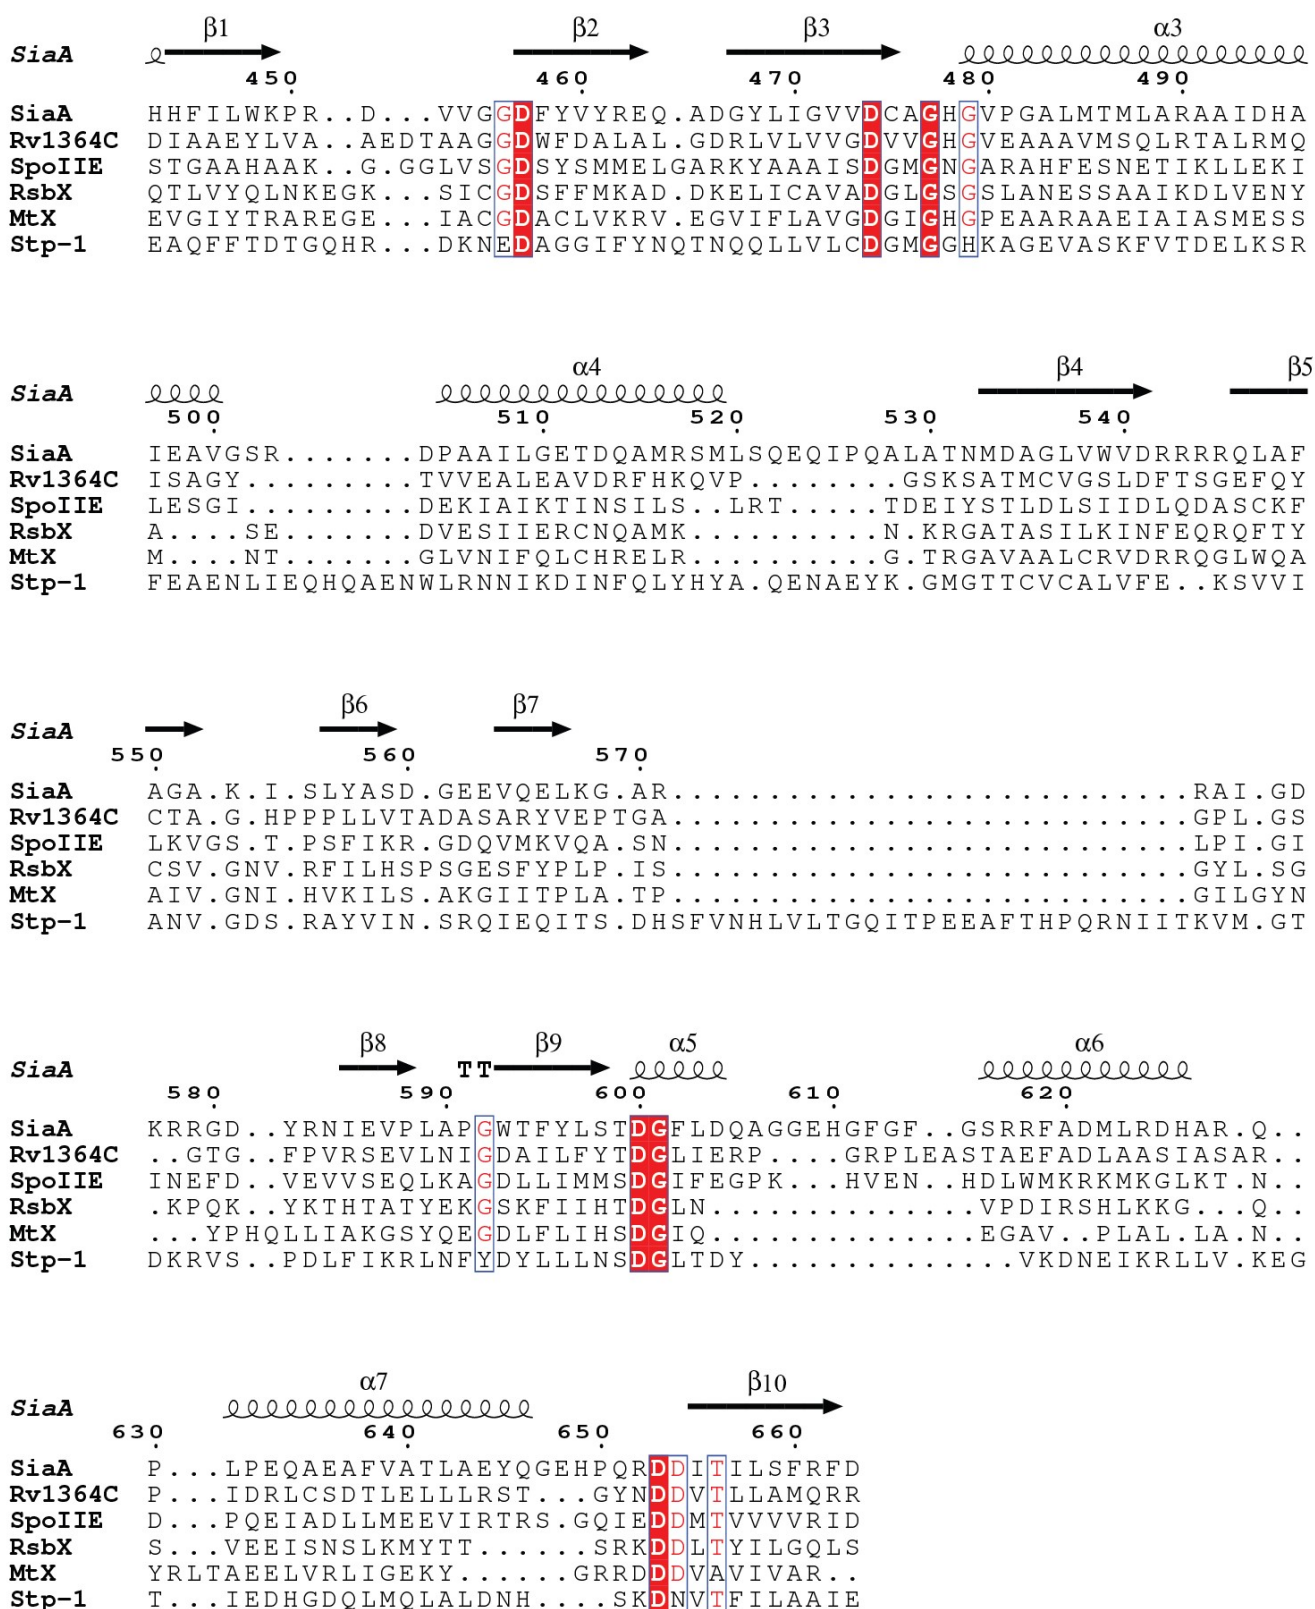

1221  
 1222 **Fig S4:** Structure-based sequence alignment of SiaA-PP2C against other PP2C-type phosphatases,  
 1223 identified by an automated search using the Dali server (ekhidna2.biocenter.helsinki.fi/dali) of 3D  
 1224 structures. Conserved residues are highlighted in red. Secondary structure features and residue number  
 1225 of SiaA-PP2C are labelled on top of the alignment.

1226



1234 **Table S2:** X-ray diffraction data collection, solution and statistics of the native and SeMet crystals of SiaA-  
1235 PP2C and SiaC.

|                                         | <b>SiaA Native</b>               | <b>SiaA SeMet</b>                 | <b>SiaC Native</b>               | <b>SiaC SeMet</b>                |
|-----------------------------------------|----------------------------------|-----------------------------------|----------------------------------|----------------------------------|
| <b>Wavelength (Å)</b>                   | 0.9764                           | 0.979                             | 0.9801                           | 0.9766                           |
| <b>Resolution range (Å)</b>             | 49.81 - 2.094<br>(2.169 - 2.094) | 27.35 - 2.49<br>(2.579 - 2.49)    | 57.96 - 1.735<br>(1.797 - 1.735) | 38.74 - 2.94<br>(3.045 - 2.94)   |
| <b>Space group</b>                      | P 21 21 21                       | P 21 21 21                        | I 2 2 2                          | P 31 2 1                         |
| <b>Unit cell (Å)</b>                    | 51.17 110.48<br>111.6 90 90 90   | 51.354 109.416<br>111.46 90 90 90 | 35.4 72.8 95.8<br>90 90 90       | 77.482 77.482<br>85.02 90 90 120 |
| <b>Total reflections</b>                | 205960 (19009)                   | 606993 (59041)                    | 116718 (7271)                    | 130598 (12091)                   |
| <b>Unique reflections</b>               | 37739 (3471)                     | 22684 (2229)                      | 13113 (1176)                     | 6550 (603)                       |
| <b>Multiplicity</b>                     | 5.5 (5.5)                        | 26.8 (26.5)                       | 8.9 (6.2)                        | 19.9 (19.9)                      |
| <b>Completeness (%)</b>                 | 99.18 (93.11)                    | 99.85 (99.82)                     | 98.94 (90.81)                    | 99.53 (96.20)                    |
| <b>Mean I/sigma (I)</b>                 | 7.20 (0.99)                      | 20.17 (1.65)                      | 12.05 (0.90)                     | 21.22 (1.56)                     |
| <b>Wilson B-factor (Å<sup>2</sup>)</b>  | 41.65                            | 66.72                             | 34.21                            | 97.73                            |
| <b>R-merge</b>                          | 0.1603 (1.432)                   | 0.1411 (1.813)                    | 0.09846<br>(1.129)               | 0.1306 (1.444)                   |
| <b>CC1/2</b>                            | 0.993 (0.461)                    | 0.998 (0.752)                     | 0.998 (0.62)                     | 0.999 (0.784)                    |
| <b>R-work</b>                           | 0.2177 (0.3346)                  | 0.2055 (0.2768)                   | 0.1972<br>(0.3956)               | 0.2122 (0.3450)                  |
| <b>R-free</b>                           | 0.2522 (0.3782)                  | 0.2542 (0.3665)                   | 0.2348<br>(0.4305)               | 0.2812 (0.4126)                  |
| <b>RMS (bonds) (Å)</b>                  | 0.014                            | 0.014                             | 0.008                            | 0.015                            |
| <b>RMS (angles) (°)</b>                 | 1.71                             | 1.77                              | 1.19                             | 1.82                             |
| <b>Ramachandran outliers (%)</b>        | 0.00                             | 0.00                              | 0.00                             | 0.41                             |
| <b>Rotamer outliers (%)</b>             | 3.73                             | 4.07                              | 0.00                             | 12.50                            |
| <b>Clashscore</b>                       | 2.80                             | 3.23                              | 2.65                             | 8.62                             |
| <b>Average B-factor (Å<sup>2</sup>)</b> | 53.79                            | 71.23                             | 43.58                            | 106.10                           |

1236

1237 **Table S3.** Strains and plasmids used in the study.

| Strains                     | Relevant features                                                                                                                                                                                                                                                                            | Reference                        |
|-----------------------------|----------------------------------------------------------------------------------------------------------------------------------------------------------------------------------------------------------------------------------------------------------------------------------------------|----------------------------------|
| <b><i>P. aeruginosa</i></b> |                                                                                                                                                                                                                                                                                              |                                  |
| PAO1                        | Wild-type <i>Pseudomonas aeruginosa</i>                                                                                                                                                                                                                                                      | Holloway Collection              |
| $\Delta siaA$               | PAO1 with a 6 bp deletion in <i>siaA</i>                                                                                                                                                                                                                                                     | [1]                              |
| $\Delta siaB$               | PAO1 with a markerless <i>loxP</i> -site insertion in <i>siaB</i> (PA0171)                                                                                                                                                                                                                   | This study                       |
| $\Delta siaC$               | PAO1 with a markerless <i>loxP</i> -site insertion in <i>siaC</i> (PA0170)                                                                                                                                                                                                                   | This study                       |
| $\Delta siaD$               | PAO1 with a markerless <i>res</i> -site insertion in <i>siaD</i> (KO0169)                                                                                                                                                                                                                    | [1]                              |
| PW1292                      | MPAO1 with transposon phoAwp091G03 inserted at bp 311 of the coding region of the <i>siaB</i> gene[                                                                                                                                                                                          | [2]                              |
| PW1290                      | MPAO1 with transposon phoAwp09q2A10 inserted at bp 181 of the coding region of the <i>siaC</i> gene                                                                                                                                                                                          | [2]                              |
| <b><i>E. coli</i></b>       |                                                                                                                                                                                                                                                                                              |                                  |
| DH5 $\alpha$                | <i>fhuA2 lac(del)U169 phoA glnV44 <math>\Phi</math>80' lacZ(del)M15 gyrA96 recA1 relA1 endA1 thi-1 hsdR17</i>                                                                                                                                                                                | [3]                              |
| S17- $\lambda$ pir          | Tp <sup>r</sup> Sm <sup>r</sup> <i>recA, thi, pro, hsdR-M</i> <sup>+</sup> RP4: 2-Tc:Mu: Km <sup>r</sup> Tn7 $\lambda$ pir                                                                                                                                                                   | [4]                              |
| BL21(DE3) Rosetta T1R       | <i>E. coli</i> str. B F <sup>-</sup> <i>ompT gal dcm lon hsdS<sub>B</sub>(r<sub>B</sub><sup>-</sup>m<sub>B</sub><sup>-</sup>) <math>\lambda</math>(DE3 [<i>lacI lacUV5-T7p07 ind1 sam7 nin5</i>]) [<i>malB</i><sup>+</sup>]<sub>K-12</sub>(<math>\lambda</math><sup>S</sup>) <i>tonA</i></i> | NTU Protein Production Plattform |
| <b>Plasmids</b>             |                                                                                                                                                                                                                                                                                              |                                  |
| pCR2.1                      | TOPO TA cloning plasmid, Amp <sup>r</sup> , Kan <sup>r</sup>                                                                                                                                                                                                                                 | Invitrogen                       |
| pBBR                        | Broad host range expression plasmid pBBR1MCS-5, Gm <sup>r</sup>                                                                                                                                                                                                                              | [5]                              |
| pJEM1                       | Rhamnose inducible broad host range expression plasmid, Kan <sup>r</sup>                                                                                                                                                                                                                     | [6]                              |
| pNIC28-BSA4                 | Protein production plasmid, N-terminal His6, TEV-cleavable MHHHHHSSGVDLGTENLYFQ*SM, Kan <sup>r</sup>                                                                                                                                                                                         | [7]                              |
| pNIC-CTHF                   | Protein production plasmid, Cleavable C-terminal His6-FLAG tag, Kan <sup>r</sup>                                                                                                                                                                                                             | [7]                              |
| pNIC[SiaA]                  | pNIC28-BSA4 harbouring the partial <i>siaA</i> gene (C-terminal phosphatase domain from amino acid 386-663) for the production of a N-terminal His6-TEV-SiaA allele (SiaA-PP2C).                                                                                                             | This study                       |
| pNIC[SiaB]                  | pNIC28-BSA4 for the production of a N-terminal His6-TEC SiaB allele                                                                                                                                                                                                                          | This study                       |
| pNIC[SiaC]                  | pNIC28-BSA4 for the production of a N-terminal His6-TEV-SiaC allele                                                                                                                                                                                                                          | This study                       |
| pJEM[SiaC]                  | pJEM1 harbouring the <i>siaC</i> gene for the production of a N-terminal His6-TEV-SiaC allele in <i>Pseudomonas aeruginosa</i> strains                                                                                                                                                       | This study                       |
| pCre1                       | Plasmid for the expression of Cre recombinase                                                                                                                                                                                                                                                | [8]                              |
| <b>Phage</b>                |                                                                                                                                                                                                                                                                                              |                                  |
| E79tv2                      | Generalised transducing phage                                                                                                                                                                                                                                                                | [9]                              |



1239 **References**

- 1240 **1.** Klebensberger, J., Birkenmaier, A., Geffers, R., Kjelleberg, S. & Philipp, B. SiaA and SiaD are essential  
1241 for inducing autoaggregation as a specific response to detergent stress in *Pseudomonas aeruginosa*.  
1242 *Environ Microbiol.* 2009;11: 3073–3086.
- 1243 **2.** Jacobs, M. A. *et al.* Comprehensive transposon mutant library of *Pseudomonas aeruginosa*. *Proc Natl*  
1244 *Acad Sci.* 2003;100: 14339–14344.
- 1245 **3.** Bethesda Research Laboratories. *E. coli* DH5 alpha competent cells. *Focus-Bethesda Res Lab.*  
1246 1986;8:9.
- 1247 **4.** Simon, R., Priefer, U. & Pühler, A. A broad host range mobilization system for in vivo genetic  
1248 engineering: Transposon mutagenesis in gram negative bacteria. *Bio/Technology* **1**, 784–791  
1249 (1983). Lämmli, U. K. Cleavage of Structural Proteins during the Assembly of the Head of Bacteriophage  
1250 T4. *Nature.* 1970;227: 680–685.
- 1251 **5.** Kovach, M. E. *et al.* Four new derivatives of the broad-host-range cloning vector pBBR1MCS, carrying  
1252 different antibiotic-resistance cassettes. *Gene.* 1995;166: 175-176.
- 1253 **6.** Jeske, M. & Altenbuchner, J. The *Escherichia coli* rhamnose promoter rhaP BAD is in *Pseudomonas*  
1254 *putida* KT2440 independent of Crp–cAMP activation. *Appl Microbiol Biotechnol.* 2010;85: 1923–1933.
- 1255 **7.** Savitsky, P. *et al.* High-throughput production of human proteins for crystallization: The SGC  
1256 experience. *J Struct Biol.* 2010;172: 3–13.
- 1257 **8.** Bailey, J. A. *et al.* Recent segmental duplications in the human genome. *Science.* 2002;297: 1003–  
1258 1007.
- 1259 **9.** Morgan, A. F. Transduction of *Pseudomonas aeruginosa* with a mutant of bacteriophage E79. *J*  
1260 *Bacteriol.* 1979;139: 137–140.
- 1261

1262 **Table S4:** Primers used in the study.

| Gene/Construct | Primer name and sequence (5' to 3') |                                                         |
|----------------|-------------------------------------|---------------------------------------------------------|
| SiaA-PP2C      | SiaA-f6117                          | TACTTCCAATCCATGCGGCACACCGCCGAGCT                        |
|                | SiaA-r6103                          | TATCCACCTTTACTGTCAGTCTCGAATCGGAAGGACAGG                 |
| SiaB           | SiaB-f6118                          | TACTTCCAATCCATGATGGAAACGCTAGACCTGCT                     |
|                | SiaB-r6104                          | TATCCACCTTTACTGTCATCAGATCACGGCGCGCAG                    |
| SiaC           | SiaC-f6119                          | TACTTCCAATCCATGATGAGTGACCTGCACATACC                     |
|                | SiaC-r6105                          | TATCCACCTTTACTGTCACTACTCGTCGTGGGCCTG                    |
| His6-TEV-SiaC  | His_TEV_SiaC_F                      | ACAATTCTTAAGAAGGAGATATACAATGCACCATCATCATC<br>ATCATTCTTC |
|                | His_TEV_SiaC_R                      | GCTTCCGGTAGTCAATAAACCGGTACTACTCGTCGTGGGC<br>CT          |

1263

1264 **Supplementary zip-file:**

- 1265 1. SiaB model\_I-Tasser
- 1266 2. SiaC-PhosT68 model\_Energy minimised
- 1267 3. SiaAC complex\_MD simulation\_60ns2
- 1268 4. SiaAC-T68P complex\_MD simulation\_60ns2
- 1269 5. SiaA-PP2C\_Mutant allele\_homology model
